# Supplementary material for: Sustainable Synthesis, Antiproliferative and Acetylcholinesterase Inhibition of 1,4- and 1,2-Naphthoquinone Derivatives
Source: MDPI journal article supplement (doi:10.3390/molecules28031232), 2023-01-27
Supplement: s1 [file s1]

## Supplementary Materials

### Sustainable synthesis, antiproliferative and acetylcholinesterase inhibition of 1,4- and 1,2-naphthoquinone derivatives

Rafaela G. Cabral <sup>1,2</sup>, Gonalo Viegas <sup>1</sup>, Rita Pacheco <sup>1,2</sup>, Ana Catarina Sousa <sup>1,2\*</sup> and Maria Paula Robalo <sup>1,2\*</sup>

<sup>1</sup> Departamento de Engenharia Qumica, Instituto Superior de Engenharia de Lisboa, Instituto Politcnico de Lisboa, 1959-007 Lisboa, Portugal;

<sup>2</sup> Centro de Qumica Estrutural, Institute of Molecular Sciences, Instituto Superior Tcnico, Universidade de Lisboa 1049-001 Lisboa, Portugal;

\* Correspondence: MPR: mprobalo@deq.isel.ipl.pt and ACS: acsousa@deq.isel.ipl.pt.

### Contents

|                                                                               |     |
|-------------------------------------------------------------------------------|-----|
| 1. HPLC profiles                                                              | S2  |
| 2. Electrochemical studies                                                    | S3  |
| 3. <i>In silico</i> analysis                                                  | S9  |
| 4. <i>In vitro</i> cytotoxicity against human hepatocarcinoma cell line HepG2 | S10 |
| 5. Inhibition of acetylcholinesterase activity                                | S12 |
| 6. Molecular docking studies                                                  | S13 |
| 7. 1D and 2D NMR spectra                                                      | S14 |
| 8. ESI/MS spectra                                                             | S31 |
| 9. HRESI/TOFMS spectra                                                        | S40 |

## 1. HPLC profiles

A)

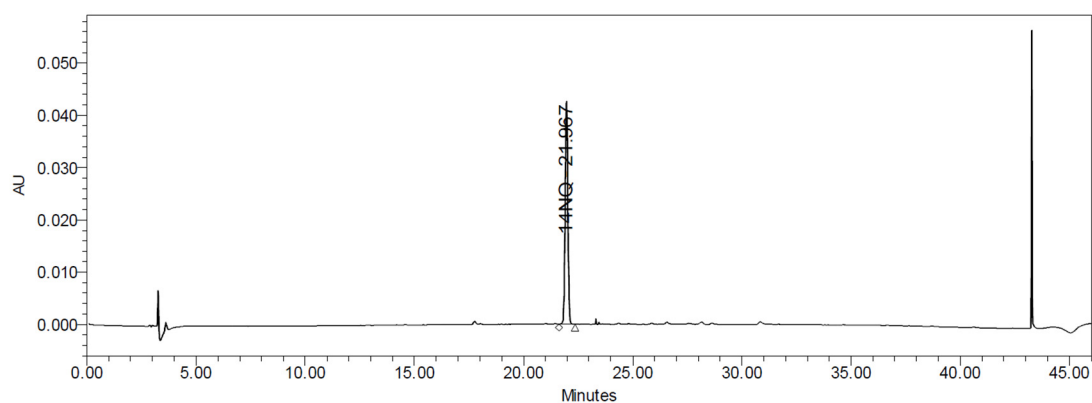

B)

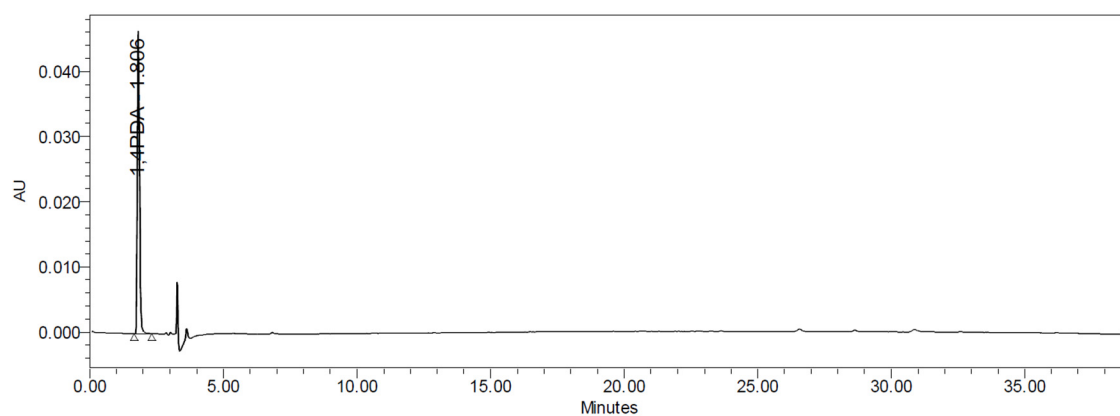

C)

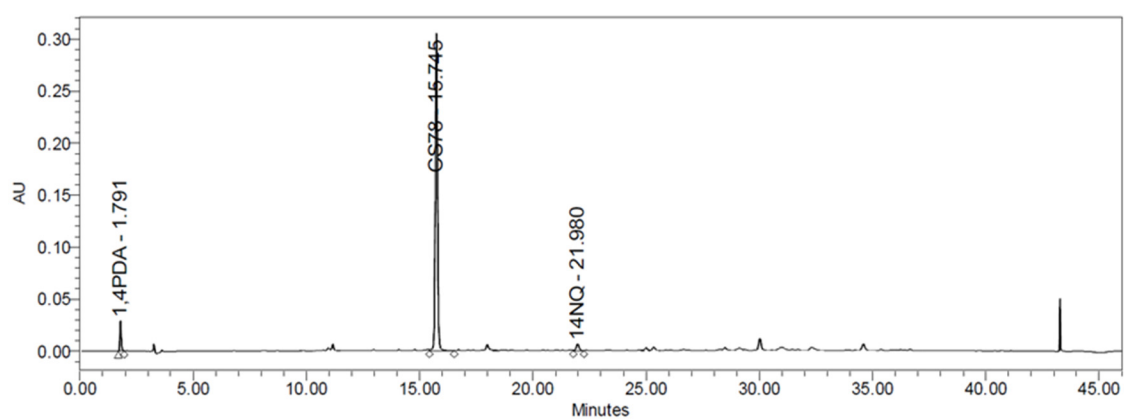

**Figure S1.** HPLC profiles of **A)** 1,4-NQ; **B)** 1,4-PDA and **C)** MA synthesis of **3a**, at optimized conditions (entry 15. Table 1).

## 2. Electrochemical studies

**Table S1.** Electrochemical parameters for 1,4-NQ and derivatives in acetonitrile (potentials are given vs SCE; scan rate: 100 mV.s<sup>-1</sup>).

| Compound  | E <sub>pa</sub> (V) | E <sub>pc</sub> (V) | E <sub>1/2</sub> (V) | E <sub>pa</sub> - E <sub>pc</sub> (mV) | I <sub>pa</sub> /I <sub>pc</sub> |
|-----------|---------------------|---------------------|----------------------|----------------------------------------|----------------------------------|
| <b>1</b>  | -0.62               | -0.70               | -0.66                | 80                                     | 0.9                              |
|           | -1.02               | -1.36               | --                   | --                                     | --                               |
| <b>3a</b> | 0.72                | 0.44                | --                   | --                                     | --                               |
|           | -0.78               | -0.86               | -0.82                | 80                                     | 0.9                              |
|           | -1.27               | -1.42               | --                   | --                                     | --                               |
| <b>3b</b> | 1,04                | --                  | --                   | --                                     | --                               |
|           | -0,77               | -0.84               | -0.81                | 70                                     | 1.0                              |
| <b>3c</b> | 1,21                | --                  | --                   | --                                     | --                               |
|           | - 0,79              | -0.86               | -0.82                | 70                                     | 1.0                              |
|           | -1,22               | -1.34               | -1.28                | 120                                    | 1.0                              |
| <b>3d</b> | -0.66               | -0.74               | -0.70                | 80                                     | 1.0                              |
| <b>3e</b> | 1,55                | --                  | --                   | --                                     | --                               |
|           | 0.74                | --                  | --                   | --                                     | --                               |
|           | -0.74               | -0.98               | -0.95                | 70                                     | 1.0                              |
|           | -1.37               | -1.47               | -1.42                | 100                                    | 1.0                              |
| <b>3f</b> | 1,40                | --                  | --                   | --                                     | --                               |
|           | -0,90               | -0.97               | -0.94                | 70                                     | 1.0                              |

**Table S2.** Electrochemical parameters for 1,2-NQ and derivatives in acetonitrile (potentials are given vs SCE; scan rate: 0.100 V.s<sup>-1</sup>).

| Compound  | E <sub>pa</sub> (V) | E <sub>pc</sub> (V) | E <sub>1/2</sub> (V) | E <sub>pa</sub> - E <sub>pc</sub> (mV) | I <sub>pa</sub> /I <sub>pc</sub> |
|-----------|---------------------|---------------------|----------------------|----------------------------------------|----------------------------------|
| <b>2</b>  | -0.44               | -0.55               | -0.50                | 110                                    | 1.0                              |
|           | -0.84               | -0.98               | -0.91                | 140                                    | 1.0                              |
| <b>4a</b> | 0.81                | --                  | --                   | --                                     | --                               |
|           | -0.47               | -0.67               | --                   | --                                     | --                               |
| <b>4b</b> | 1,16                | --                  | --                   | --                                     | --                               |
|           | 0,93                | --                  | --                   | --                                     | --                               |
|           | -0,36               | -0.61               | --                   | --                                     | --                               |
| <b>4c</b> | 1.07                | --                  | --                   | --                                     | --                               |
|           | -0.44               | -0.67               | --                   | --                                     | --                               |
|           | -1.30               | -1.58               | --                   | --                                     | --                               |
| <b>4d</b> | 0.76                | --                  | --                   | --                                     | --                               |
|           | -0.33               | -0.47               | --                   | --                                     | --                               |
|           | --                  | -0.84               | --                   | --                                     | --                               |
| <b>4g</b> | 0.92                | --                  | --                   | --                                     | --                               |
|           | 0.75                | --                  | --                   | --                                     | --                               |
|           | -0.35               | -0.63               | --                   | --                                     | --                               |
|           | --                  | -1.43               | --                   | --                                     | --                               |
| <b>4h</b> | 1.39                | --                  | --                   | --                                     | --                               |
|           | 1.08                | --                  | --                   | --                                     | --                               |
|           | --                  | 0.13                | --                   | --                                     | --                               |
|           | -0.15               | -0.57               | --                   | --                                     | --                               |
|           | --                  | -0.81               | --                   | --                                     | --                               |
|           | -0.75               | -0.98               | --                   | --                                     | --                               |
| <b>4e</b> | 1.48                | --                  | --                   | --                                     | --                               |
|           | 1.01                | --                  | --                   | --                                     | --                               |
|           | -0.63               | -0.78               | -0.71                | 150                                    | --                               |
| <b>4f</b> | 1.38                | --                  | --                   | --                                     | --                               |
|           | 0.91                | --                  | --                   | --                                     | --                               |
|           | --                  | -0.52               | --                   | --                                     | --                               |
|           | -0.57               | -0.69               | -0.63                | 120                                    | 0.9                              |

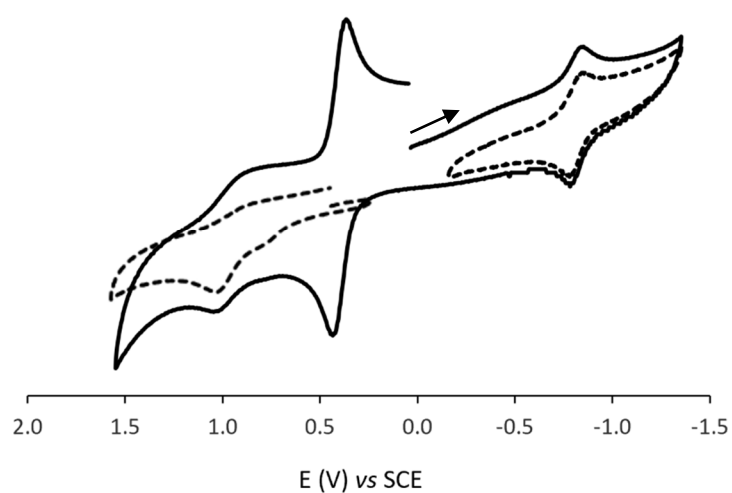

**Figure S2.** Cyclic voltammogram of **3b** in ACN + TBAPF<sub>6</sub> showing the ferrocene redox pair (black line) and the isolated redox processes (dashed line) at scan rate of 100 mV.s<sup>-1</sup>.

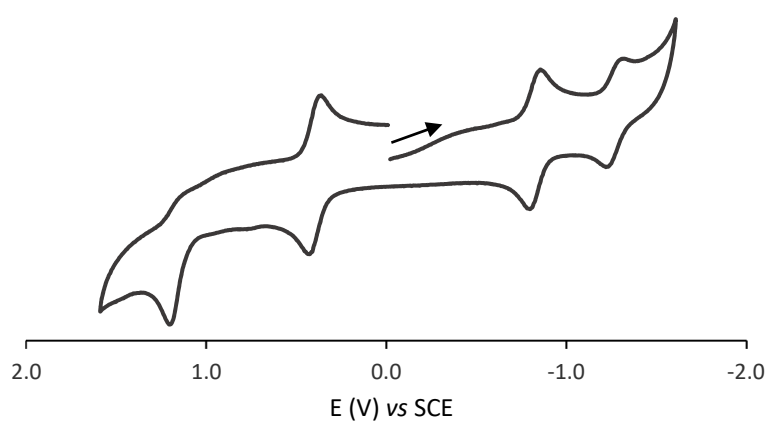

**Figure S3.** Cyclic voltammogram of **3c** in ACN + TBAPF<sub>6</sub>, showing the ferrocene redox pair at scan rate of 100 mV.s<sup>-1</sup>.

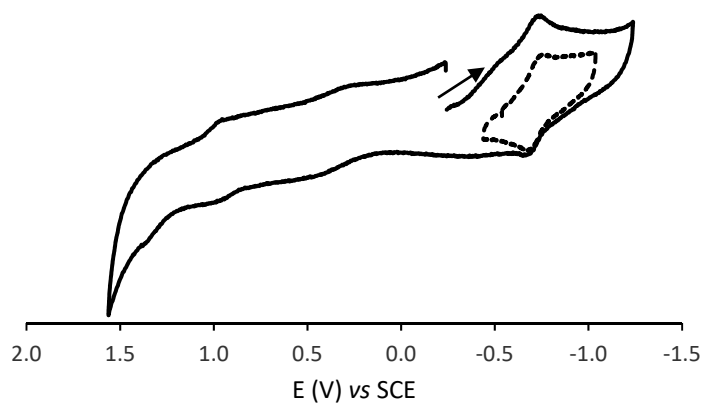

**Figure S4.** Cyclic voltammogram of **3d** in ACN + TBAPF<sub>6</sub> (black line) showing the isolated redox process (dashed line) at scan rate of 100 mV.s<sup>-1</sup>.

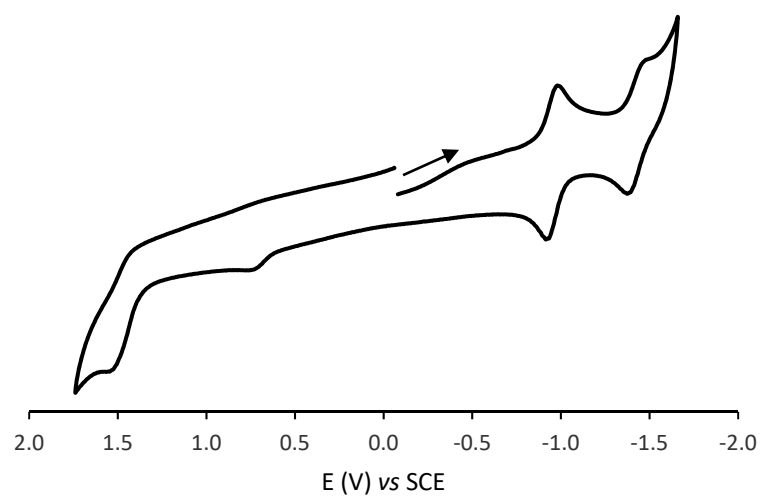

**Figure S5.** Cyclic voltammogram of **3e** in ACN + TBAPF<sub>6</sub> at scan rate of 100 mV.s<sup>-1</sup>.

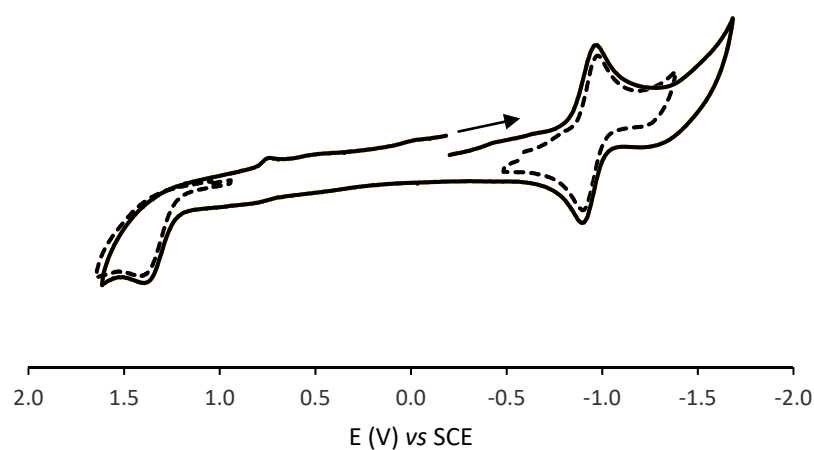

**Figure S6.** Cyclic voltammogram of **3f** in ACN + TBAPF<sub>6</sub> (black line) showing the isolated redox processes (dashed line) at scan rate of 100 mV.s<sup>-1</sup>.

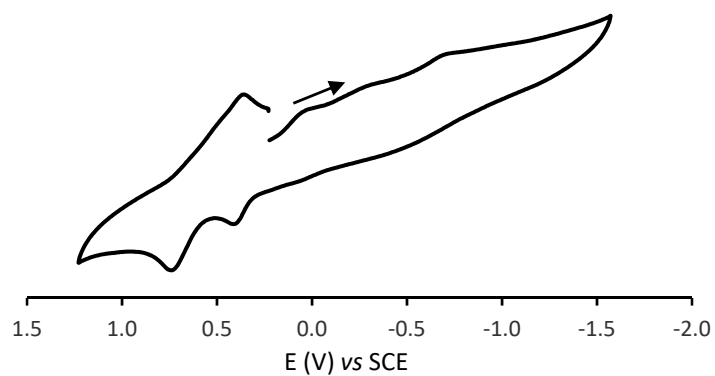

**Figure S7.** Cyclic voltammogram of **4a** in ACN + TBAPF<sub>6</sub> showing the ferrocene redox pair at scan rate of 100 mV.s<sup>-1</sup>.

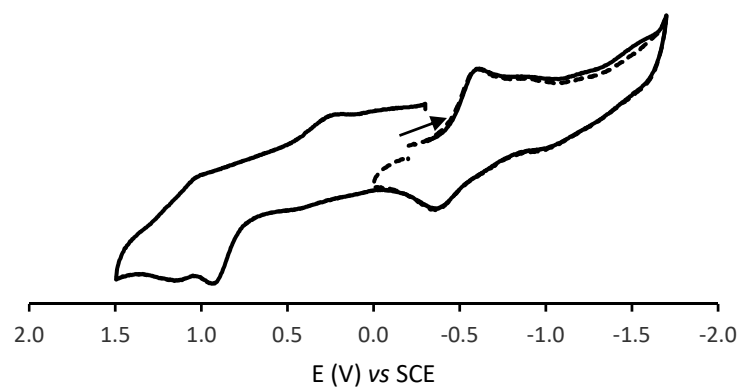

**Figure S8.** Cyclic voltammogram of **4b** in ACN + TBAPF<sub>6</sub> (black line) showing the isolated redox process (dashed line) at scan rate of 100 mV.s<sup>-1</sup>.

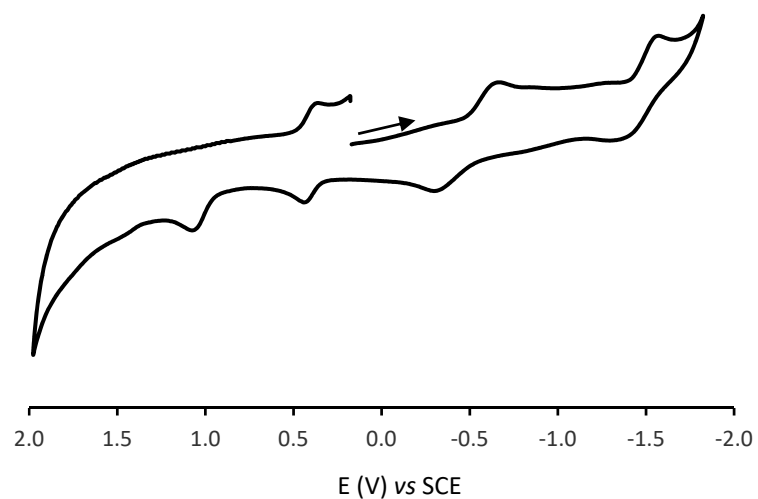

**Figure S9.** Cyclic voltammogram of **4c** in ACN + TBAPF<sub>6</sub> showing the ferrocene redox pair at scan rate of 100 mV.s<sup>-1</sup>.

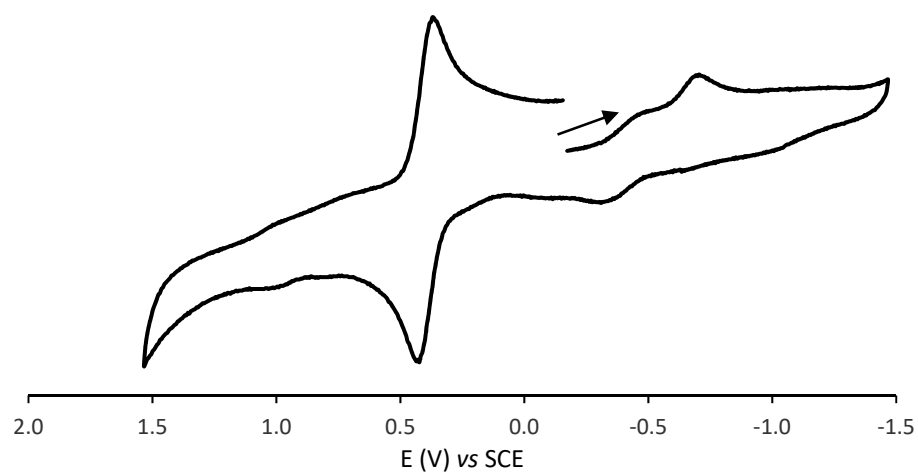

**Figure S10.** Cyclic voltammogram of **4d** in ACN + TBAPF<sub>6</sub> showing the ferrocene redox pair at scan rate of 100 mV.s<sup>-1</sup>.

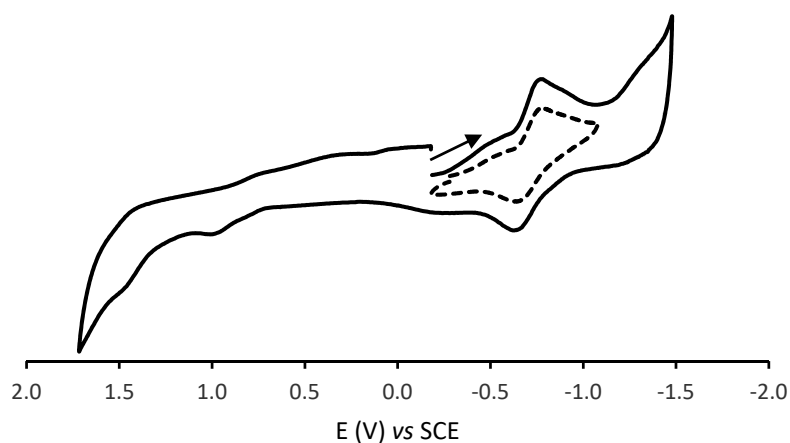

**Figure S11.** Cyclic voltammogram of **4e** in ACN + TBAPF<sub>6</sub> (black line) showing the isolated redox process (dashed line) at scan rate of 100 mV.s<sup>-1</sup>.

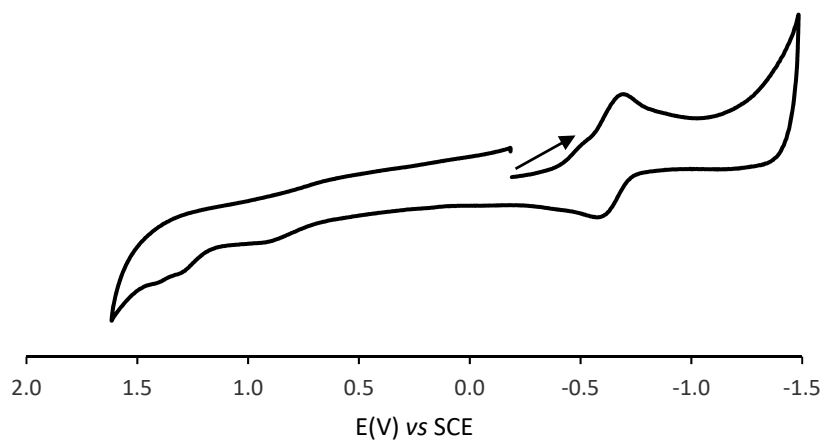

**Figure S12.** Cyclic voltammogram of **4f** in ACN + TBAPF<sub>6</sub> at scan rate of 100 mV.s<sup>-1</sup>.

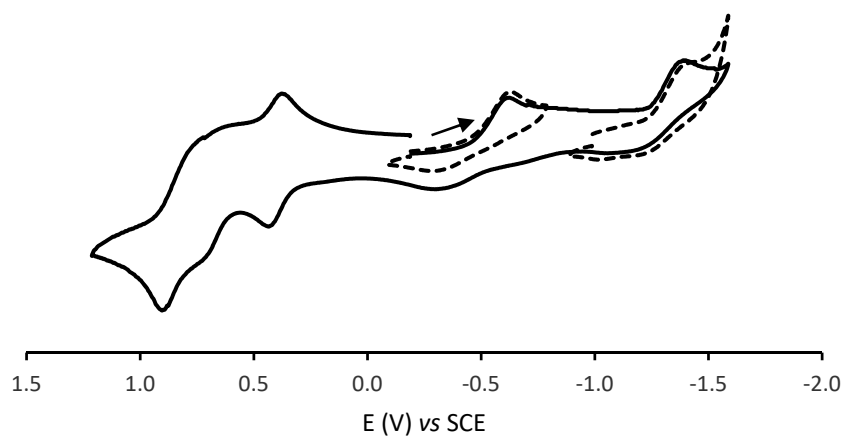

**Figure S13.** Cyclic voltammogram of **4g** in ACN + TBAPF<sub>6</sub> showing the ferrocene redox pair (black line) and the isolated redox processes (dashed line) at scan rate of 100 mV.s<sup>-1</sup>.

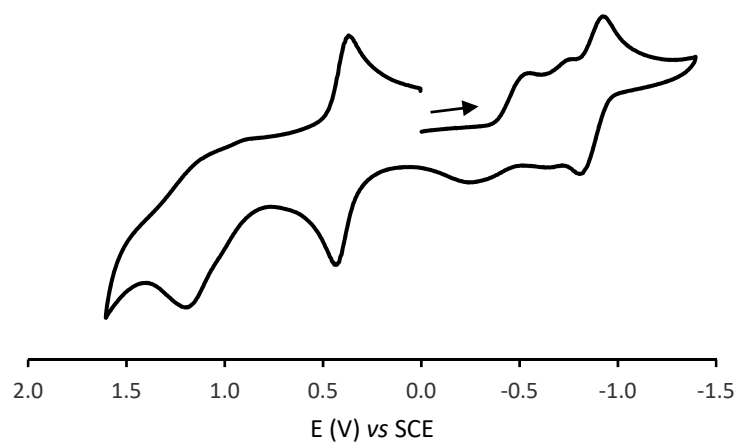

**Figure S14.** Cyclic voltammogram of **4h** in ACN + TBAPF<sub>6</sub> showing the ferrocene redox pair (black line) and the isolated redox processes (dashed line) at scan rate of 100 mV.s<sup>-1</sup>.



### 3. In silico analysis

**Table S3.** Lipinski's parameters for compounds **1** and **3a-f** estimated using Molinspiration.

| Compound  | Lipinski's parameters |         |       |                 |                   |                  |                         | ABS% <sup>1</sup> |
|-----------|-----------------------|---------|-------|-----------------|-------------------|------------------|-------------------------|-------------------|
|           | M (g/mol)             | mi LogP | TPSA  | n <sub>OH</sub> | n <sub>OHNH</sub> | n <sub>rot</sub> | n <sub>violations</sub> |                   |
| <b>1</b>  | 158.16                | 1.67    | 34.14 | 2               | 0                 | 0                | 0                       | 98.83             |
| <b>3a</b> | 264.28                | 2.66    | 72.19 | 4               | 3                 | 2                | 0                       | 84.55             |
| <b>3b</b> | 265.27                | 3.11    | 66.4  | 4               | 2                 | 2                | 0                       | 92.53             |
| <b>3c</b> | 279.3                 | 3.64    | 55.4  | 4               | 1                 | 3                | 0                       | 97.78             |
| <b>3d</b> | 274.28                | 3.34    | 69.96 | 4               | 1                 | 2                | 0                       | 97.60             |
| <b>3e</b> | 229.28                | 2.89    | 46.17 | 3               | 1                 | 4                | 0                       | 97.42             |
| <b>3f</b> | 229.28                | 2.45    | 37.38 | 3               | 0                 | 3                | 0                       | 99.37             |

**Table S4.** Lipinski's parameters for compounds **2** and **4a-h** estimated using Molinspiration.

| Compound  | Lipinski's parameters |         |       |                 |                   |                  |                         | ABS% <sup>1</sup> |
|-----------|-----------------------|---------|-------|-----------------|-------------------|------------------|-------------------------|-------------------|
|           | M (g/mol)             | mi LogP | TPSA  | n <sub>OH</sub> | n <sub>OHNH</sub> | n <sub>rot</sub> | n <sub>violations</sub> |                   |
| <b>2</b>  | 158.16                | 1.67    | 34.14 | 2               | 0                 | 0                | 0                       | 98.83             |
| <b>4a</b> | 264.28                | 2.66    | 72.19 | 4               | 3                 | 2                | 0                       | 84.55             |
| <b>4b</b> | 265.27                | 3.11    | 66.4  | 4               | 2                 | 2                | 0                       | 92.53             |
| <b>4c</b> | 279.30                | 3.64    | 55.4  | 4               | 1                 | 3                | 0                       | 97.78             |
| <b>4d</b> | 274.28                | 3.34    | 69.96 | 4               | 1                 | 2                | 0                       | 97.60             |
| <b>4g</b> | 340.38                | 5.58    | 91.99 | 4               | 2                 | 2                | 0                       | 97.18             |
| <b>4h</b> | 265.27                | 3.32    | 66.4  | 4               | 2                 | 2                | 0                       | 92.53             |
| <b>4e</b> | 229.28                | 2.89    | 46.17 | 3               | 1                 | 4                | 0                       | 97.42             |
| <b>4f</b> | 229.28                | 2.45    | 37.38 | 3               | 0                 | 3                | 0                       | 99.37             |

$$ABS\% = 100 \times \left[ \exp(-10^{0.506 - 0.0754 \times n_{OH} - 0.141 \times n_{OHNH} + 0.00184 \times MM}) \right]$$

**Table S5.** Bioactivity scores compounds **1**, **2**, **3a-f** and **4a-h** estimated using Molinspiration.

| Compound  | GPCR ligand | Ion channel modulator | Kinase inhibitor | Nuclear receptor ligand | Protease inhibitor | Enzyme inhibitor |
|-----------|-------------|-----------------------|------------------|-------------------------|--------------------|------------------|
| <b>1</b>  | -0.94       | -0.46                 | -0.77            | -1                      | -1.1               | -0.34            |
| <b>3a</b> | -0.11       | -0.25                 | <b>0.46</b>      | -0.6                    | -0.3               | <b>0.20</b>      |
| <b>3b</b> | -0.12       | -0.28                 | <b>0.40</b>      | -0.12                   | -0.4               | <b>-0.14</b>     |
| <b>3c</b> | -0.19       | -0.41                 | <b>0.32</b>      | -0.26                   | -0.42              | <b>0.02</b>      |
| <b>3d</b> | -0.11       | -0.32                 | <b>0.47</b>      | -0.13                   | -0.33              | <b>0.12</b>      |
| <b>3e</b> | -0.17       | -0.32                 | -0.02            | -0.37                   | -0.42              | 0.23             |
| <b>3f</b> | -0.19       | -0.36                 | -0.06            | -0.46                   | -0.62              | 0.04             |
| <b>2</b>  | -0.87       | -0.4                  | -0.76            | -1.18                   | -0.91              | -0.05            |
| <b>4a</b> | 0.01        | 0.01                  | <b>0.46</b>      | -0.34                   | -0.06              | <b>0.43</b>      |
| <b>4b</b> | -0.01       | -0.02                 | <b>0.39</b>      | -0.11                   | -0.16              | <b>0.37</b>      |
| <b>4c</b> | -0.07       | -0.16                 | <b>0.31</b>      | -0.24                   | -0.20              | <b>0.24</b>      |
| <b>4d</b> | 0.00        | -0.07                 | <b>0.47</b>      | -0.12                   | -0.10              | <b>0.34</b>      |
| <b>4g</b> | 0.03        | -0.05                 | <b>0.33</b>      | -0.13                   | -0.01              | <b>0.24</b>      |
| <b>4h</b> | 0.00        | -0.32                 | <b>0.32</b>      | -0.32                   | -0.25              | <b>0.32</b>      |
| <b>4e</b> | -0.12       | -0.01                 | <b>-0.01</b>     | -0.47                   | -0.23              | <b>0.34</b>      |
| <b>4f</b> | -0.16       | -0.14                 | <b>-0.08</b>     | -0.45                   | -0.38              | <b>0.20</b>      |

A molecule having bioactivity score more than 0.00 is most likely to exhibit considerable biological activities, while values -0.50 to 0.00 are expected to be moderately active and if score is less than -0.50 it is presumed to be inactive.

#### 4. *In vitro* cytotoxicity against human hepatocarcinoma cell line HepG2

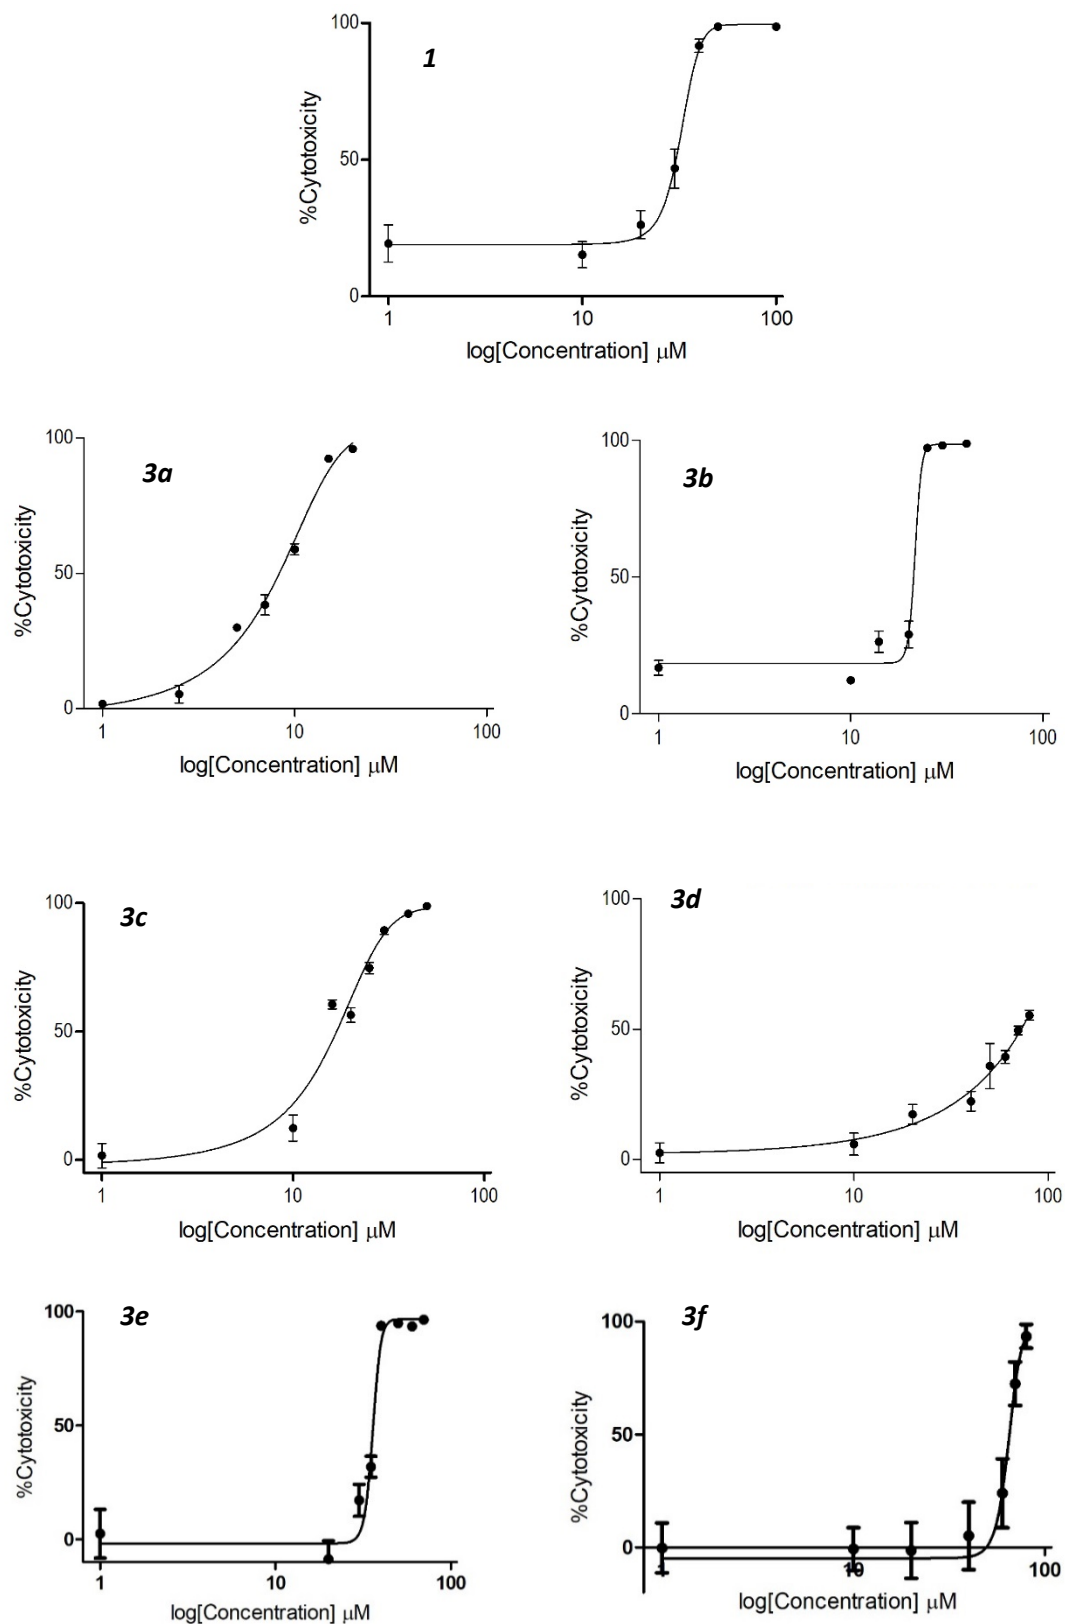

**Figure S15.** Cytotoxicity profiles of compounds **1** and **3a-f** in HepG2 human cell line.

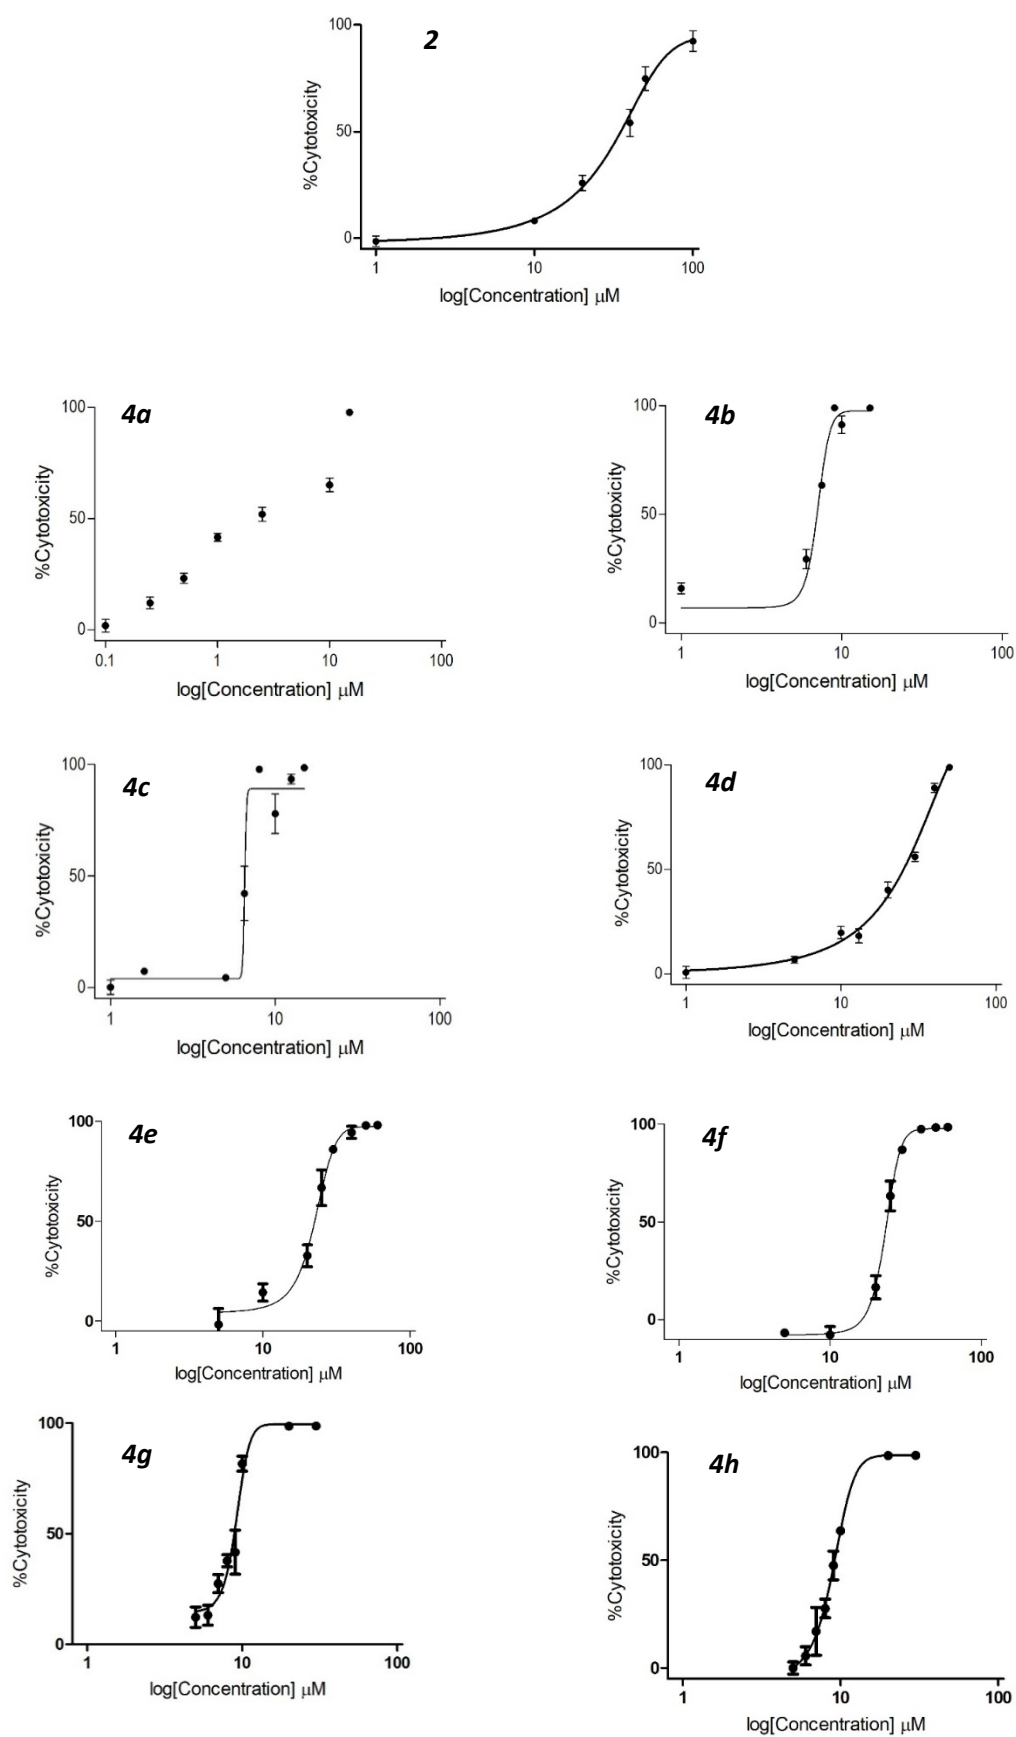

**Figure S16.** Cytotoxicity profiles of compound **2** and **4a-h** in HepG2 human cell line.

**Table S6.** The EC<sub>50</sub> values for the cytotoxicity of compounds **1**, **2**, **3a-f**, **4a-h** and reference inhibitor doxorubicin against HepG2 cell line.

| <i>Compound</i>    | <i>EC<sub>50</sub> (μM±SD)</i> |
|--------------------|--------------------------------|
| <b>1</b>           | 32.2 ± 1.4                     |
| <b>3a</b>          | 8.7 ± 1.3                      |
| <b>3b</b>          | 21.4 ± 3.9                     |
| <b>3c</b>          | 13.0 ± 1.8                     |
| <b>3d</b>          | 79.4 ± 1.4                     |
| <b>3e</b>          | 35.8 ± 1.5                     |
| <b>3f</b>          | 64.7 ± 1.4                     |
| <b>2</b>           | 25.6 ± 1.1                     |
| <b>4a</b>          | 2.7 ± 1.0                      |
| <b>4b</b>          | 7.1 ± 1.8                      |
| <b>4c</b>          | 6.5 ± 1.4                      |
| <b>4d</b>          | 26.8 ± 1.1                     |
| <b>4g</b>          | 9.2 ± 2.3                      |
| <b>4h</b>          | 9.1 ± 3.3                      |
| <b>4e</b>          | 26.8 ± 1.1                     |
| <b>4f</b>          | 23.1 ± 1.7                     |
| <b>Doxorubicin</b> | 1.42 ± 1.0                     |

All EC<sub>50</sub> values are expressed as the mean ± SD of triplicate determinations.

## 5. Inhibition of acetylcholinesterase activity

**Table S7.** AChE Inhibitor<sub>50μM</sub> values for compounds **1**, **2**, **3a-f**, **4a-h**.

| <i>Compound</i> | <i>Inhibitor<sub>50μM</sub> (μM±SD)</i> |
|-----------------|-----------------------------------------|
| <b>1</b>        | 50.7 ± 2.3                              |
| <b>3a</b>       | 23.4 ± 2.5                              |
| <b>3b</b>       | 16.4 ± 2.0                              |
| <b>3c</b>       | 25.9 ± 3.0                              |
| <b>3d</b>       | 25.8 ± 3.0                              |
| <b>3e</b>       | 48.3 ± 1.6                              |
| <b>3f</b>       | 47.9 ± 2.5                              |
| <b>2</b>        | 34.9 ± 5.2                              |
| <b>4a</b>       | 51.7 ± 2.1                              |
| <b>4b</b>       | 74.1 ± 1.1                              |
| <b>4c</b>       | 45.8 ± 2.9                              |
| <b>4d</b>       | 41.6 ± 2.4                              |
| <b>4g</b>       | 75.3 ± 1.3                              |
| <b>4h</b>       | 85.3 ± 1.3                              |
| <b>4e</b>       | 62.4 ± 1.5                              |
| <b>4f</b>       | 54.71 ± 2.0                             |

All Inhibitor<sub>50μM</sub> values are expressed as the mean ± SD of triplicate determinations.

## 6. Molecular docking studies

**Table S8.** Molecular docking results of **3b**.

| AA      | Atom               | Interaction type          | Distance (Å) |
|---------|--------------------|---------------------------|--------------|
| Phe 295 | O=C (Quinone ring) | N-H...O(O=C) <sup>a</sup> | 2,14         |
| Val 294 | O=C (Quinone ring) | C-H...O(O=C)              | 2,70         |
| Trp 286 | C=C (Ar NQ ring)   | $\pi$ - $\pi$ stacking    | 5,09         |
| Trp 286 | Ar (NQ ring)       | $\pi$ - $\pi$ stacking    | 3,90         |
| Trp 286 | Ar (Quinone ring)  | $\pi$ - $\pi$ stacking    | 5,41         |
| Tyr 341 | Ar (Quinone ring)  | $\pi$ - $\pi$ stacking    | 4,60         |
| Tyr 341 | Ar (NQ ring)       | $\pi$ - $\pi$ stacking    | 3,93         |

<sup>a</sup> Conventional Hydrogen Bond

**Table S9.** Molecular docking results of **4b**.

| AA      | Atom               | Interaction type       | Distance (Å) |
|---------|--------------------|------------------------|--------------|
| Gly 120 | O-C (Ar ring)      | N-H...O(O-C)           | 2,69         |
| Tyr 124 | O=C (Quinone ring) | O-H...O(O=C)           | 2,69         |
| Tyr 133 | O-C (Ar ring)      | O-H...O(O-C)           | 2,35         |
| Glu 202 | H-O (Ar ring)      | O...H-O(O-C)           | 1,89         |
| Trp 86  | Ar ring            | $\pi$ - $\pi$ stacking | 4,61         |
| Trp 86  | Ar ring            | $\pi$ - $\pi$ stacking | 3,76         |
| Tyr 337 | Ar (NQ ring)       | $\pi$ - $\pi$ stacking | 4,06         |
| Tyr 337 | Ar (Quinone ring)  | $\pi$ - $\pi$ stacking | 5,36         |
| Tyr 341 | Ar (NQ ring)       | $\pi$ - $\pi$ stacking | 4,83         |
| Tyr 341 | Ar (Quinone ring)  | $\pi$ - $\pi$ stacking | 5,55         |

<sup>a</sup> Conventional Hydrogen Bond

**Table S10.** Molecular docking results of **4h**.

| AA      | Atom               | Interaction type       | Distance (Å) |
|---------|--------------------|------------------------|--------------|
| Tyr 133 | O=C (Quinone ring) | O-H...O(O=C)           | 3,46         |
| Gly 126 | O=C (Quinone ring) | O-H...O(O=C)           | 4,70         |
| Tyr 337 | H-N (Ar ring)      | O...H-N                | 3,09         |
| Tyr 341 | H-O (Ar ring)      | O...H-O(O-C)           | 3,26         |
| Tyr 341 | Ar ring            | $\pi$ - $\pi$ stacking | 4,25         |
| Tyr 337 | Ar ring            | $\pi$ - $\pi$ stacking | 4,69         |
| Trp 86  | Ar (NQ ring)       | $\pi$ - $\pi$ stacking | 4,15         |
| Trp 86  | Ar (Quinone ring)  | $\pi$ - $\pi$ stacking | 4,24         |

<sup>a</sup> Conventional Hydrogen Bond

## 7. 1D and 2D NMR spectra

### Compound **3a**:

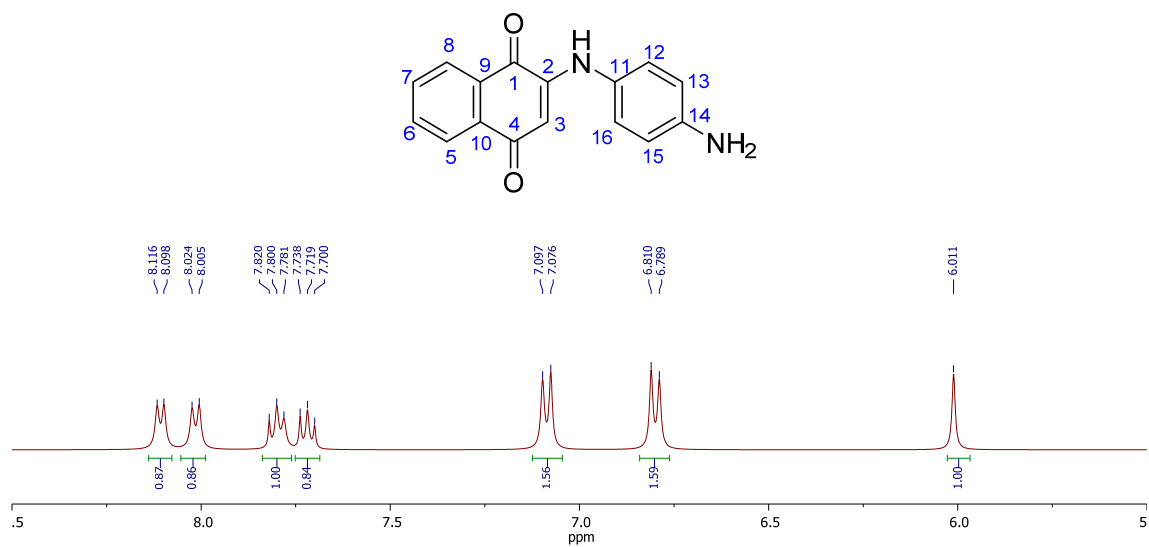

Figure S17. <sup>1</sup>H-NMR spectrum of compound **3a** in MeOD-*d*<sub>4</sub>

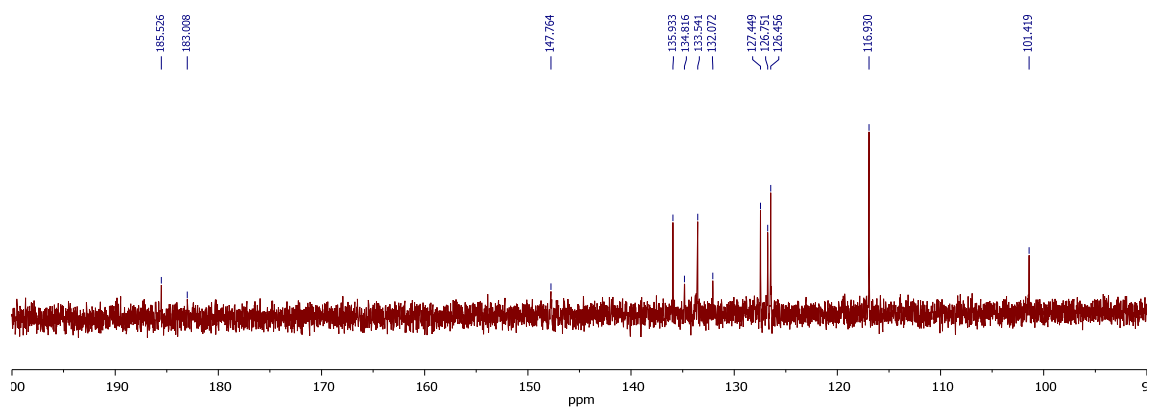

Figure S18. <sup>13</sup>C-NMR spectrum of compound **3a** in MeOD-*d*<sub>4</sub>

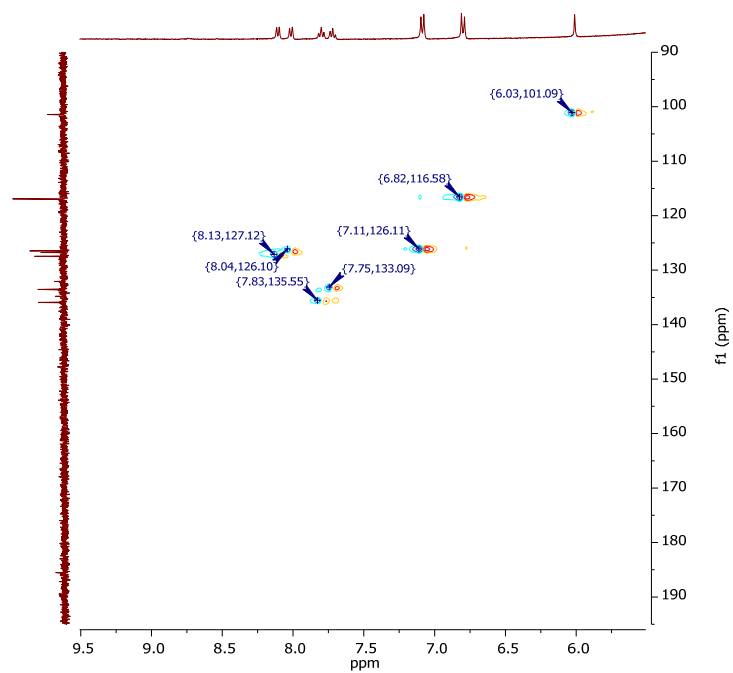

Figure S19. HSQC-NMR spectrum of compound **3a** in MeOD- $d_4$

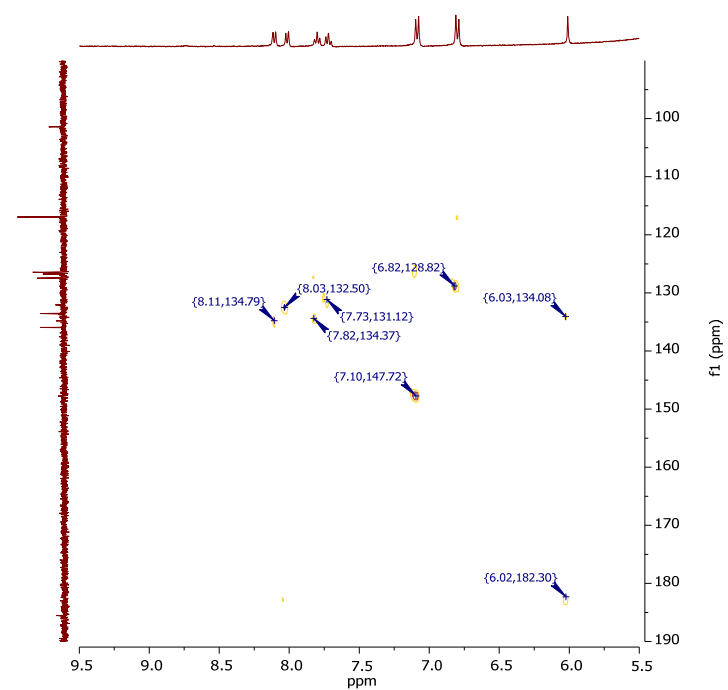

Figure S20. HMBC-NMR spectrum of compound **3a** in MeOD- $d_4$

**Compound 3b:**

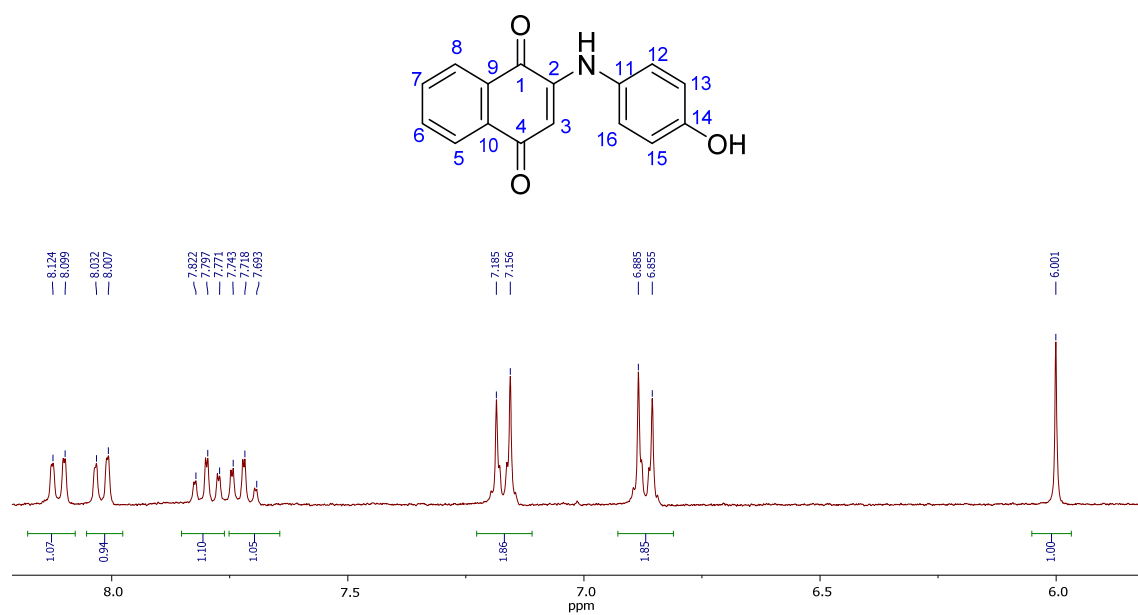

**Figure S21.** <sup>1</sup>H-NMR spectrum of compound **3b** in MeOD-*d*<sub>4</sub>

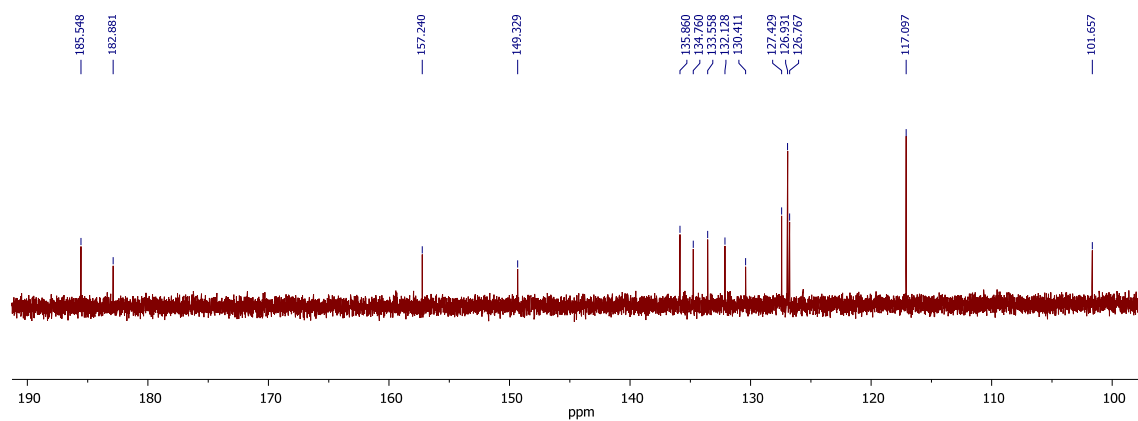

**Figure S22.** <sup>13</sup>C-NMR spectrum of compound **3b** in MeOD-*d*<sub>4</sub>



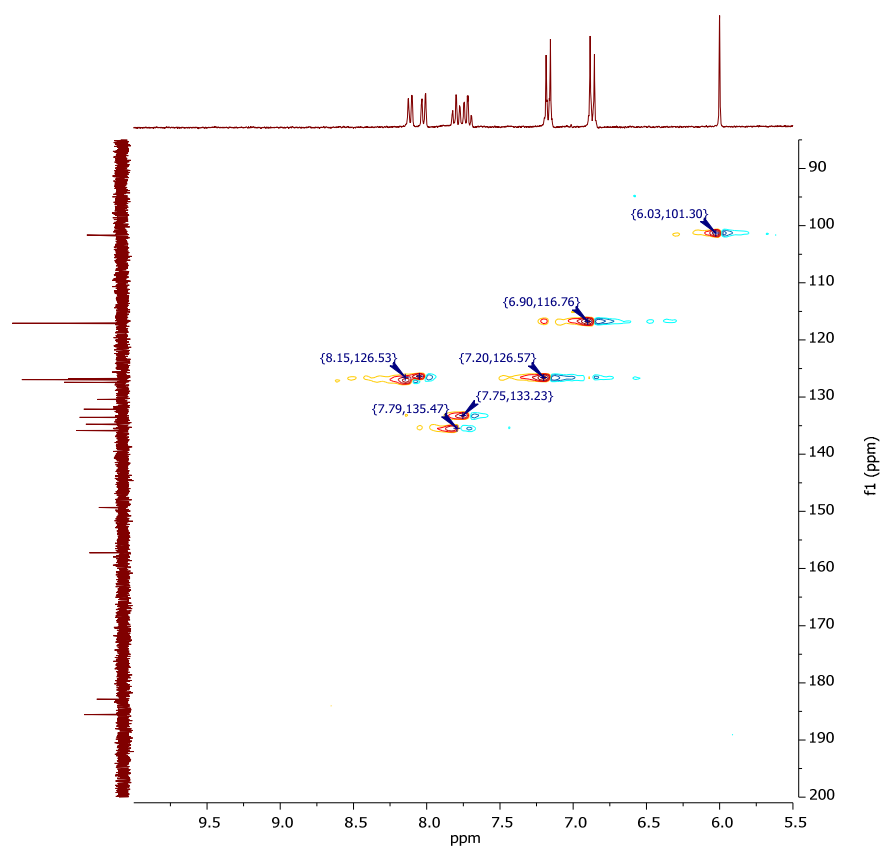

Figure S23. HSQC-NMR spectrum of compound **3b** in MeOD- $d_4$

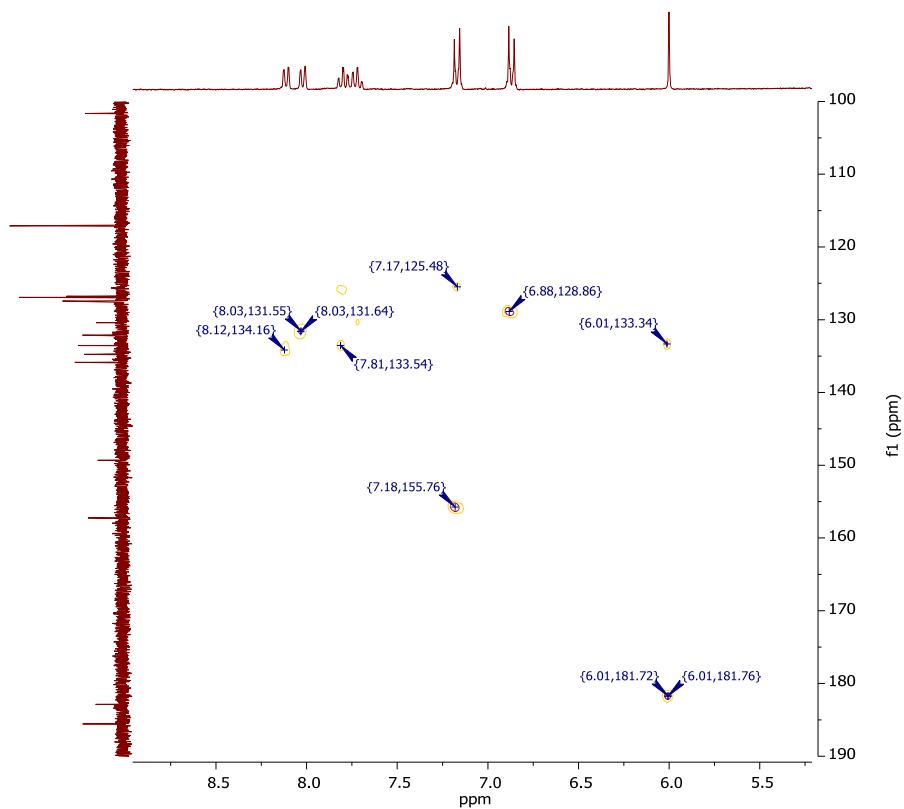

Figure S24. HMBC-NMR spectrum of compound **3b** in MeOD- $d_4$

**Compound 3c:**

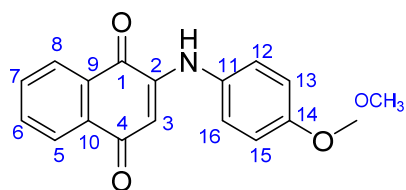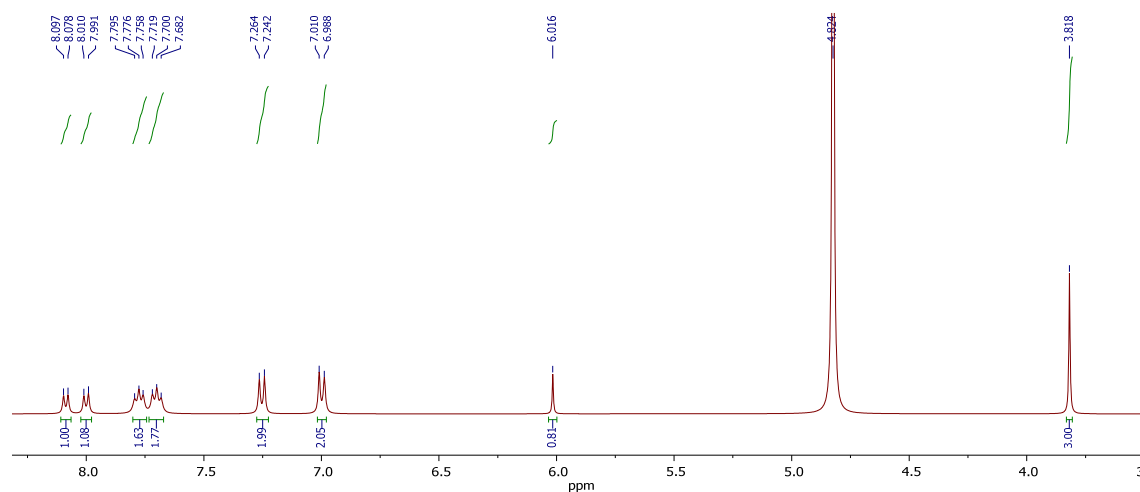

**Figure S25.** <sup>1</sup>H-NMR spectrum of compound 3c in MeOD-*d*<sub>4</sub>

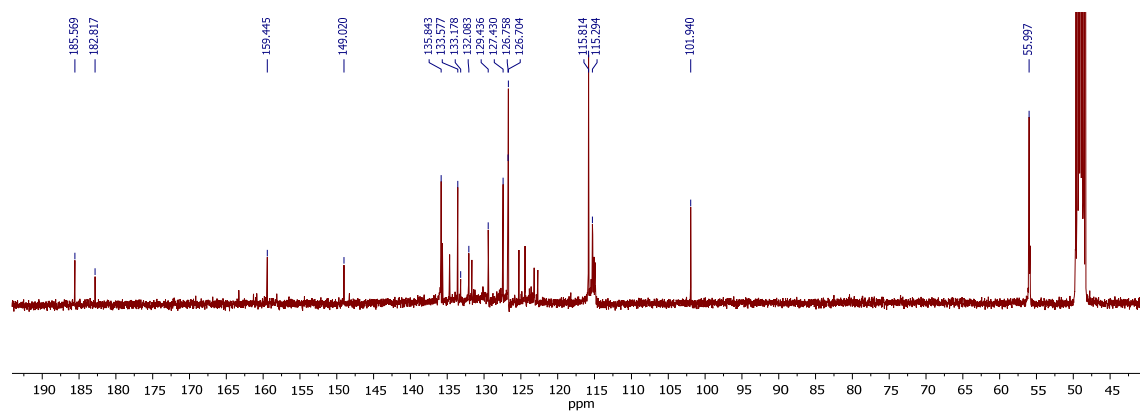

**Figure S26.** <sup>13</sup>C-NMR spectrum of compound 3c in MeOD-*d*<sub>4</sub>

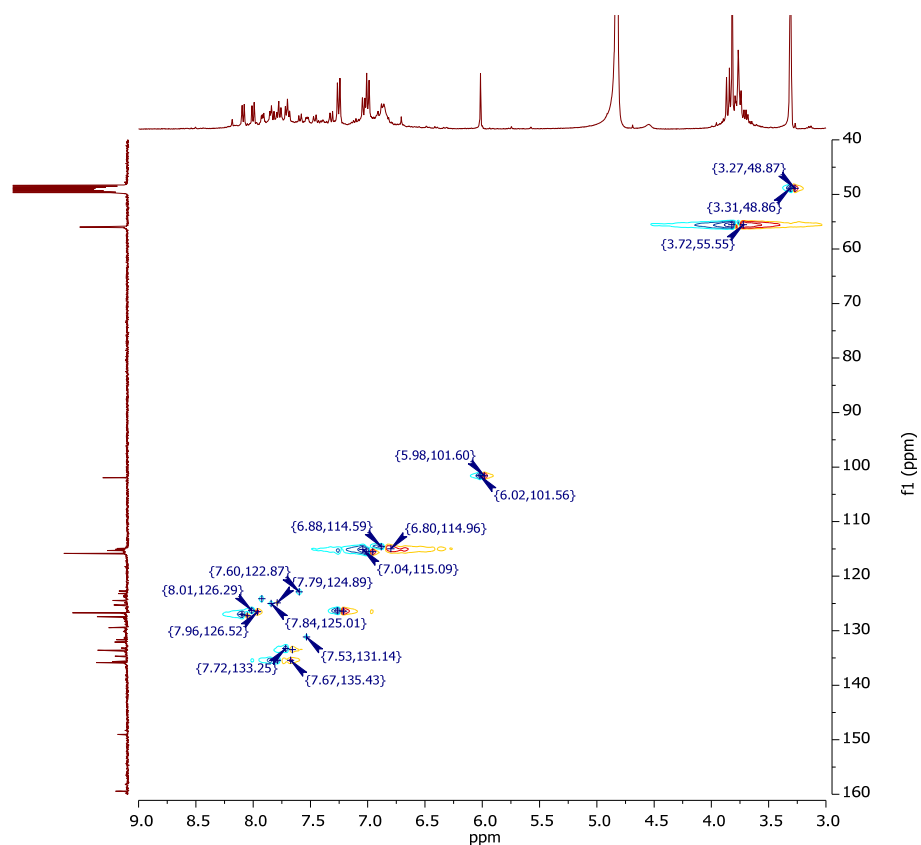

Figure S27. HSQC-NMR spectrum of compound **3c** in MeOD- $d_4$

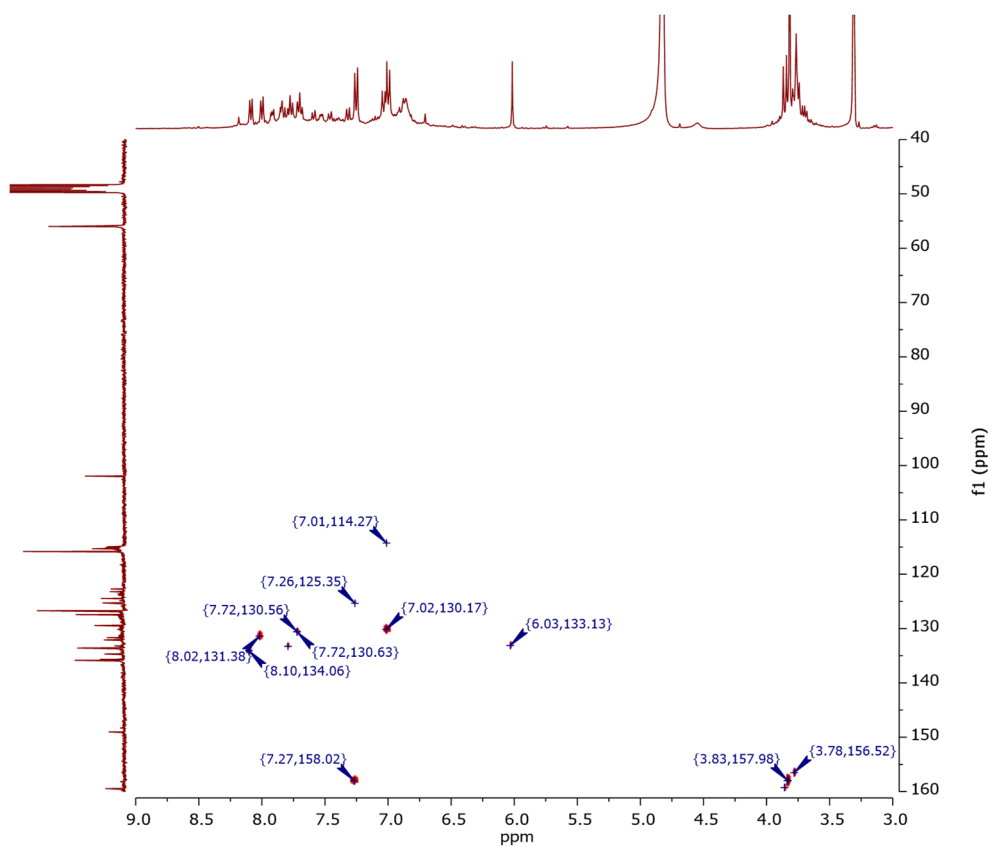

Figure S28. HMBC-NMR spectrum of compound **3c** in MeOD- $d_4$

**Compound 3d:**

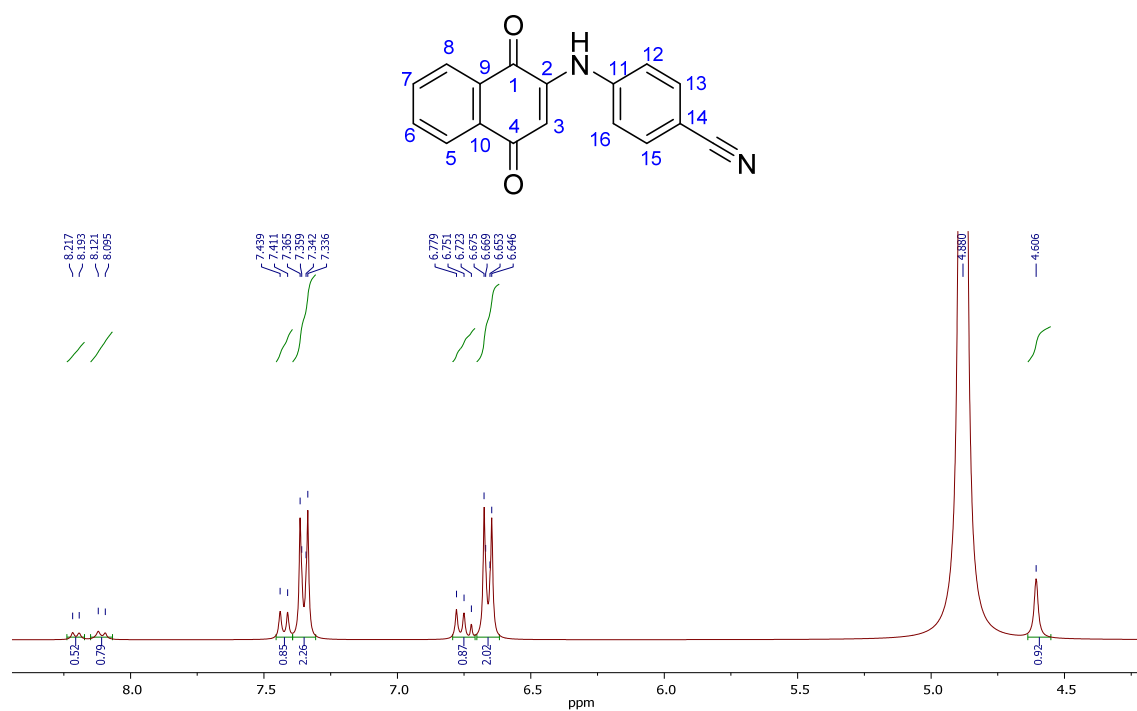

**Figure S29.**  $^1\text{H}$ -NMR spectrum of compound **3d** in  $\text{MeOD}-d_4$

**Compound 3e:**

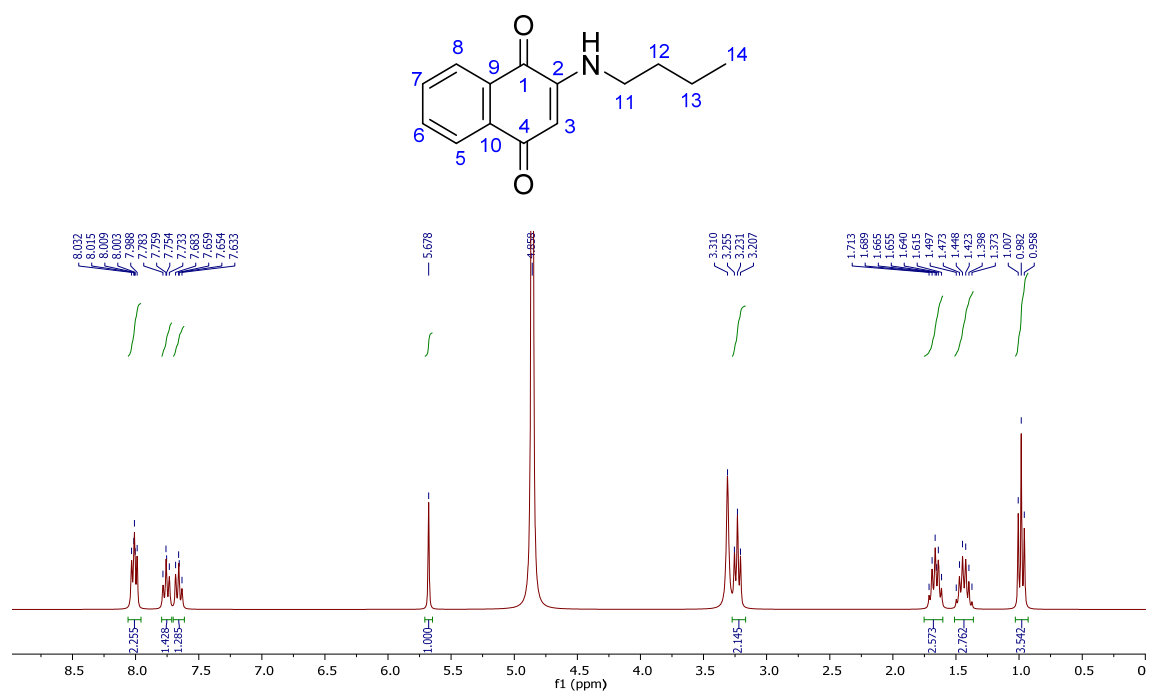

**Figure S30.**  $^1\text{H}$ -NMR spectrum of compound **3e** in  $\text{MeOD-}d_4$

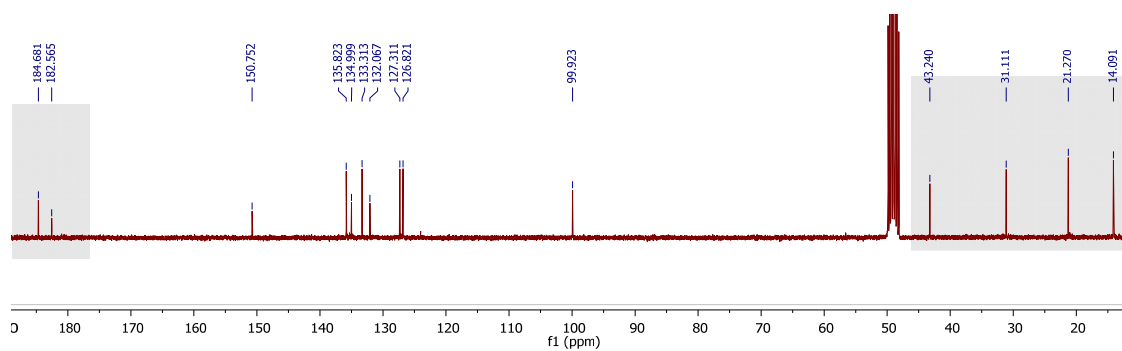

**Figure S31.**  $^{13}\text{C}$ -NMR spectrum of compound **3e** in  $\text{MeOD-}d_4$

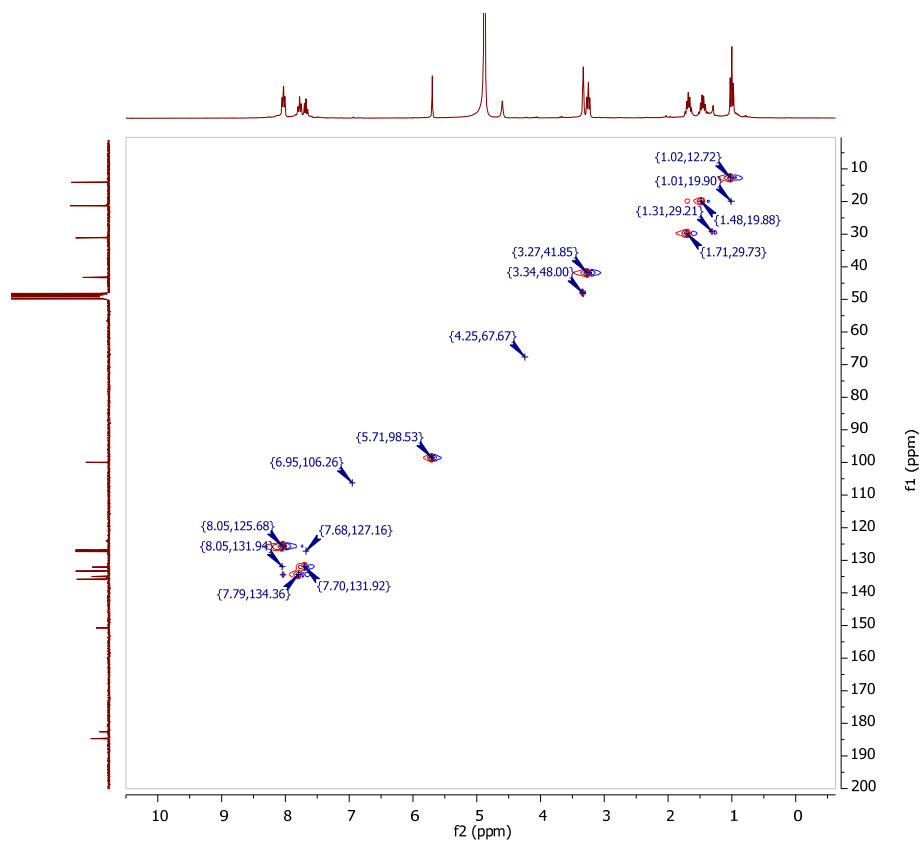

Figure S32. HSQC-NMR spectrum of compound **3e** in MeOD- $d_4$

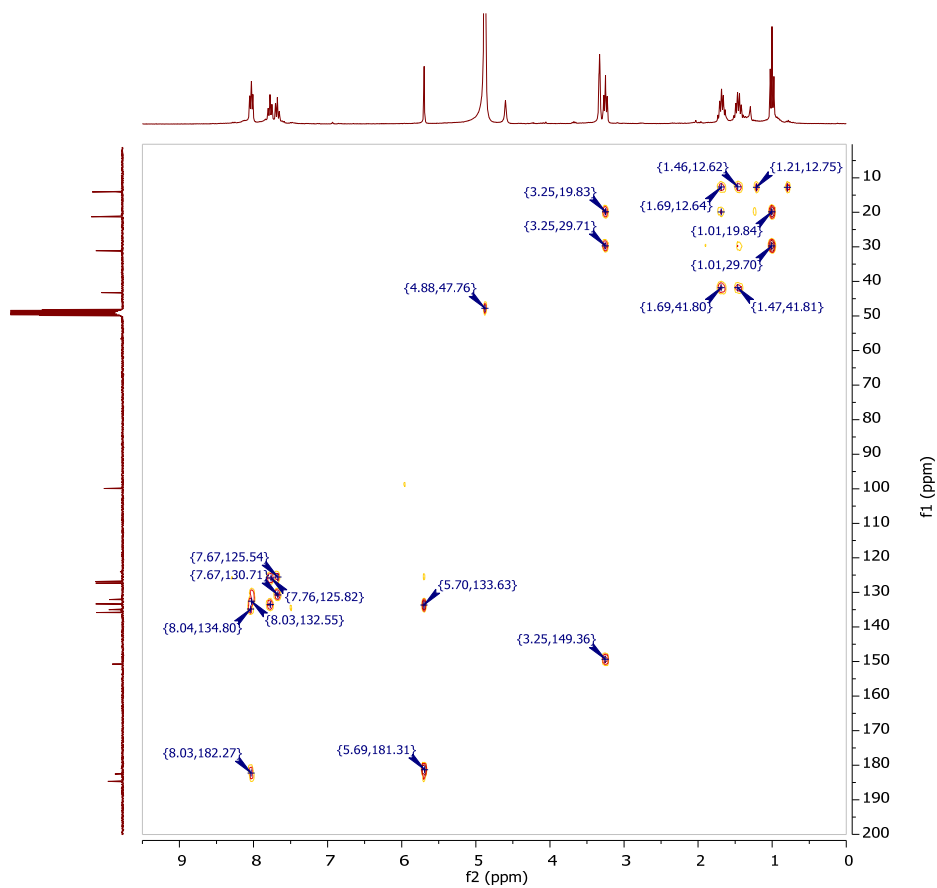

Figure S33. HMBC-NMR spectrum of compound **3e** in MeOD- $d_4$

**Compound 3f:**

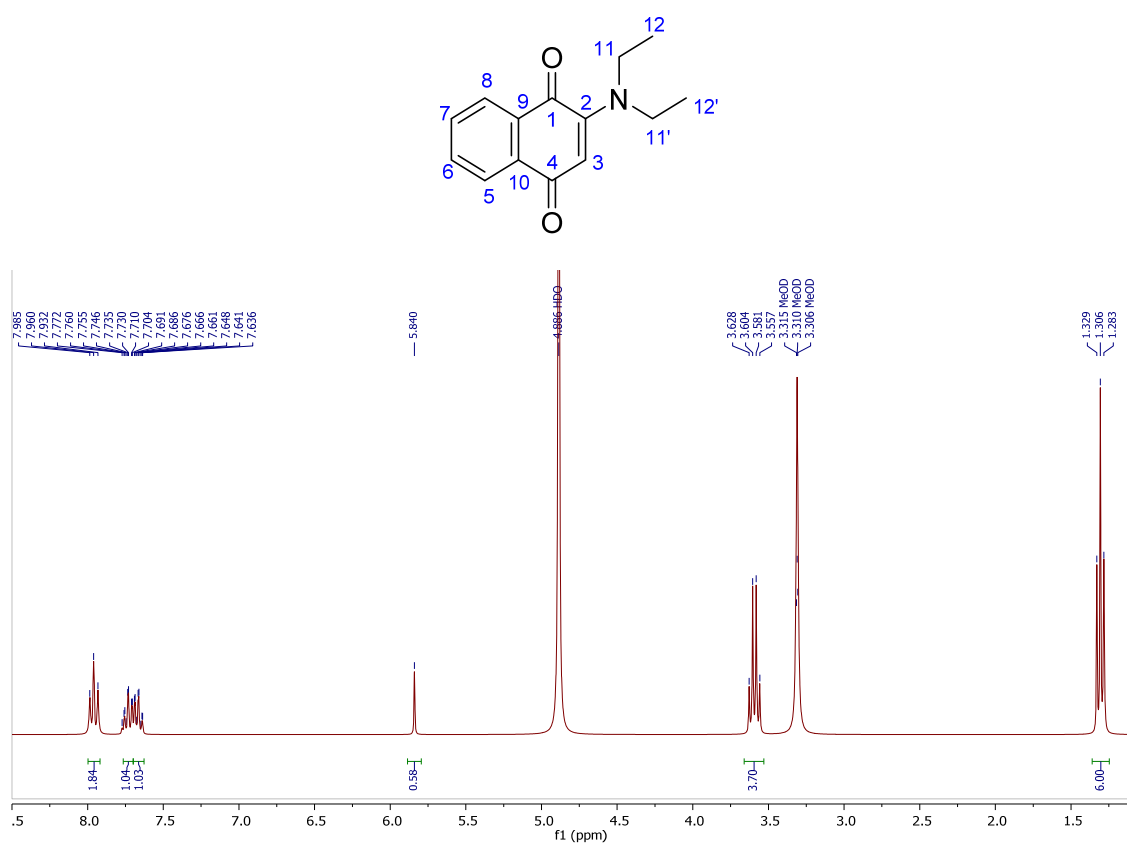

**Figure S34.**  $^1\text{H}$ -NMR spectrum of compound **3f** in  $\text{MeOD-}d_4$

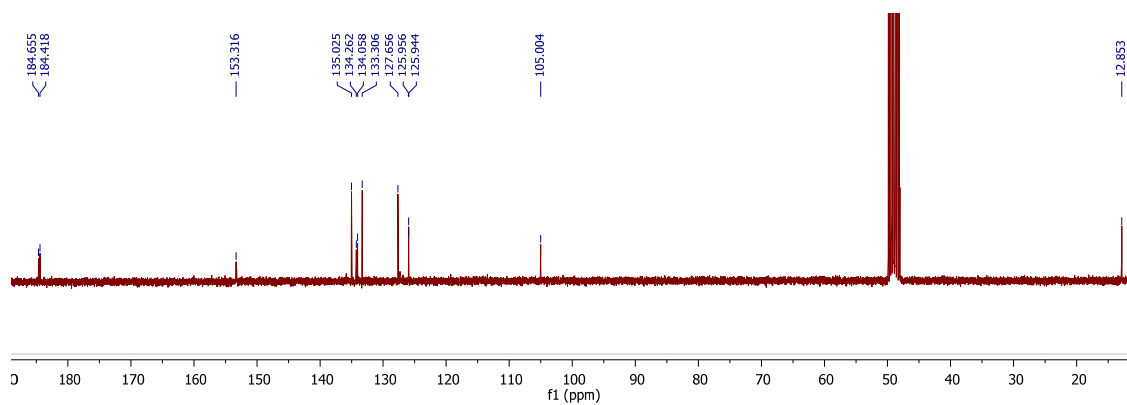

**Figure S35.**  $^{13}\text{C}$ -NMR spectrum of compound **3f** in  $\text{MeOD-}d_4$

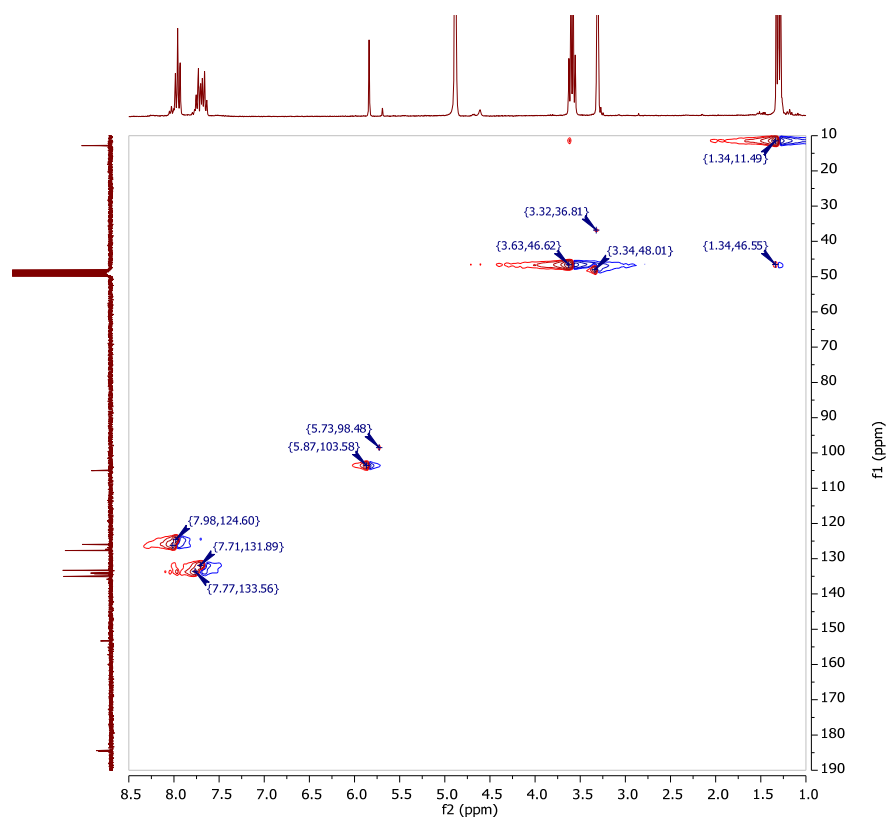

**Figure S36.** HSQC-NMR spectrum of compound **3f** in MeOD- $d_4$

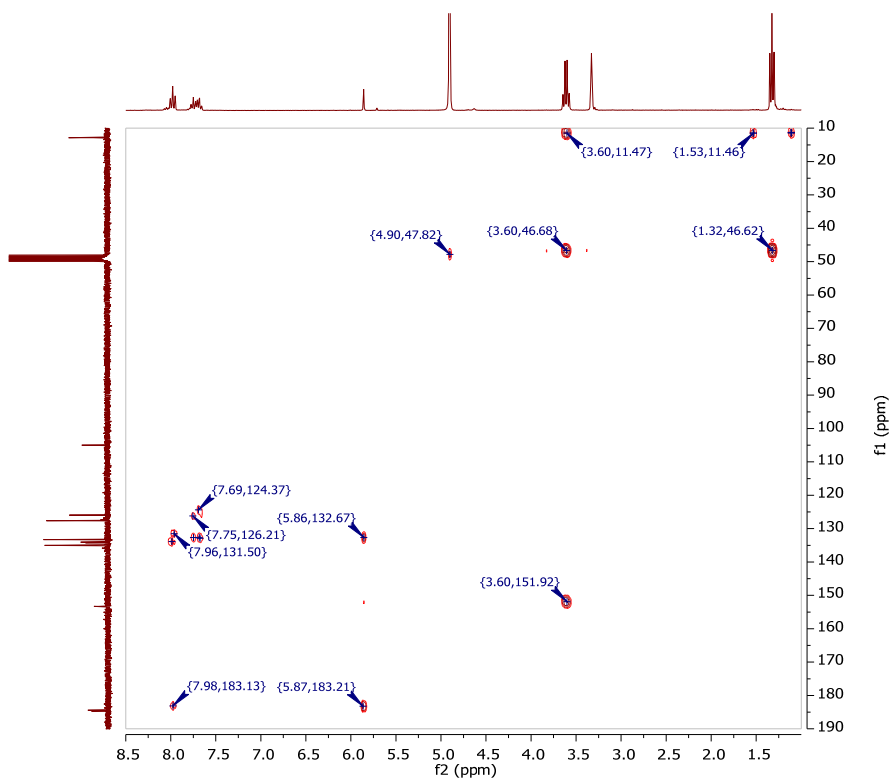

**Figure S37.** HMBC-NMR spectrum of compound **3f** in MeOD- $d_4$



**Compound 4e:**

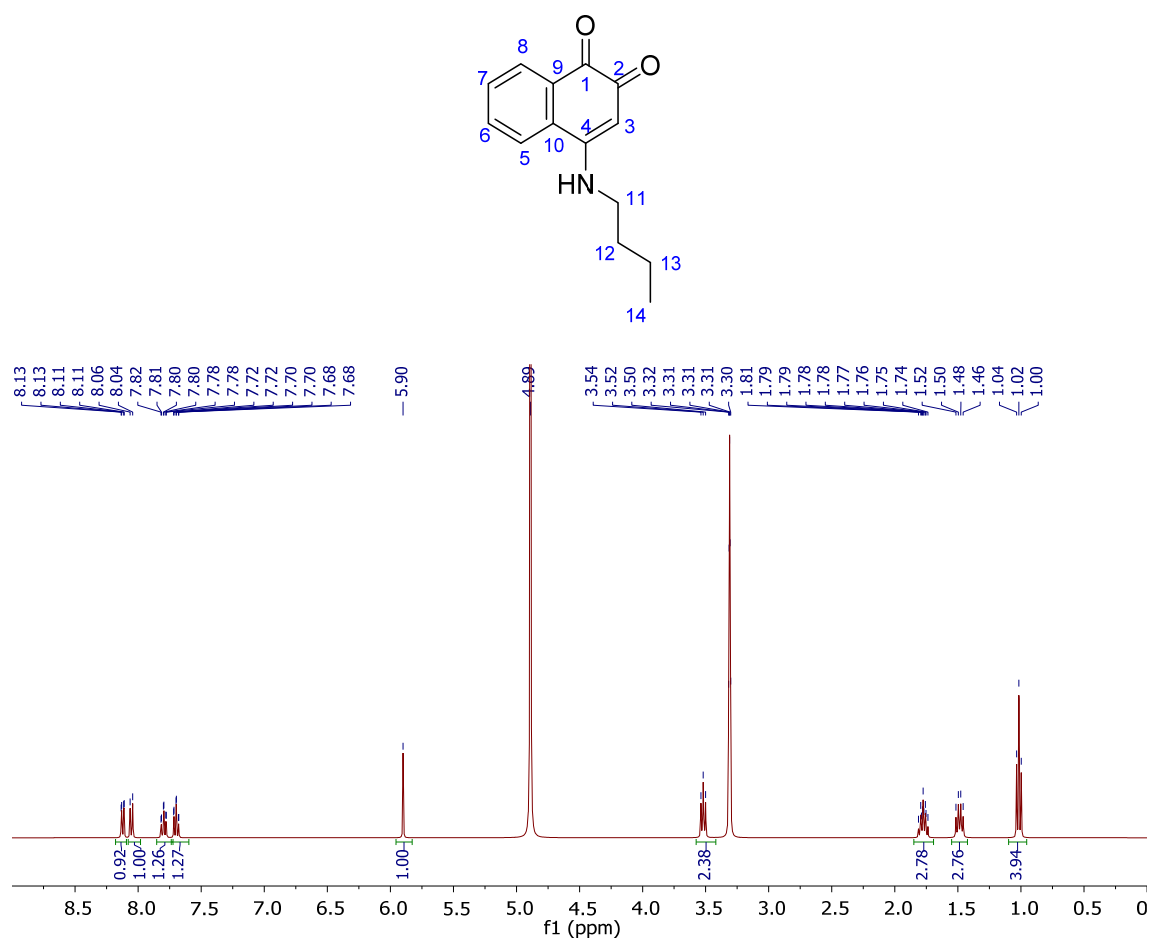

**Figure S38.**  $^1\text{H}$ -NMR spectrum of compound **4e** in  $\text{MeOD}-d_4$

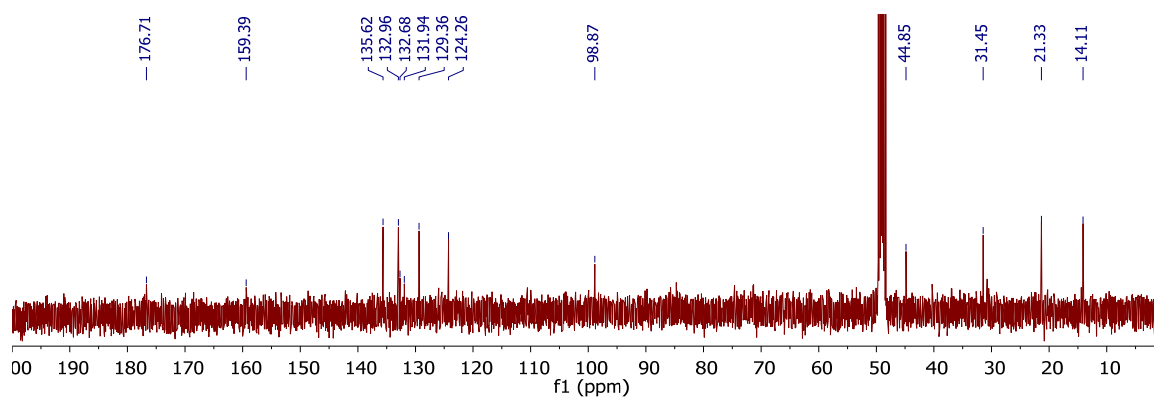

**Figure S39.**  $^{13}\text{C}$ -NMR spectrum of compound **4e** in  $\text{MeOD}-d_4$

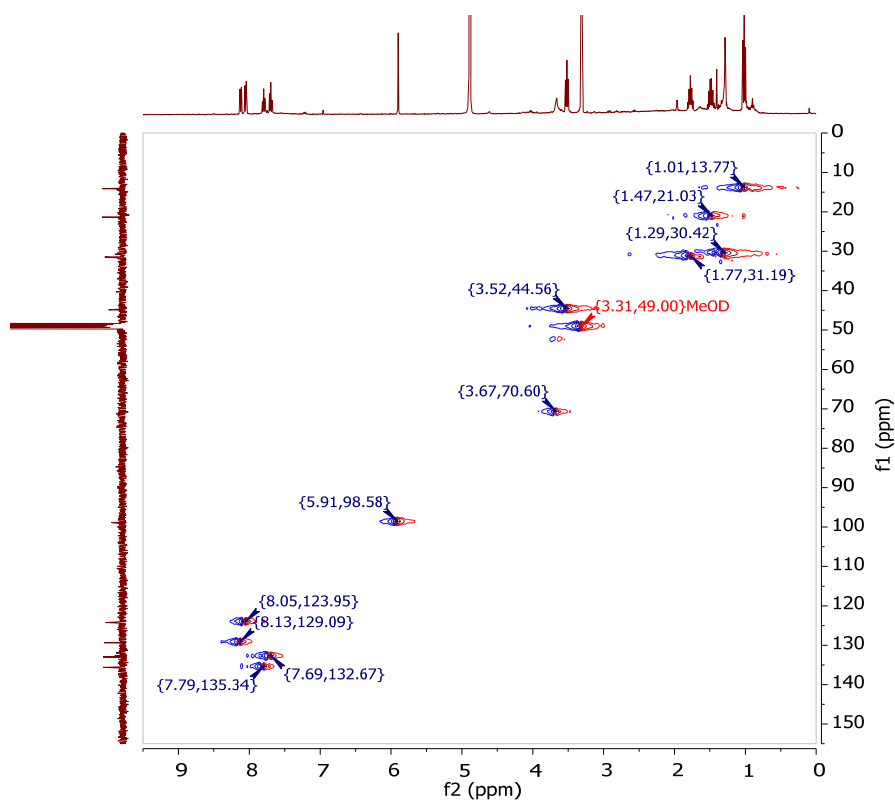

Figure S40. HSQC-NMR spectrum of compound **4e** in MeOD- $d_4$

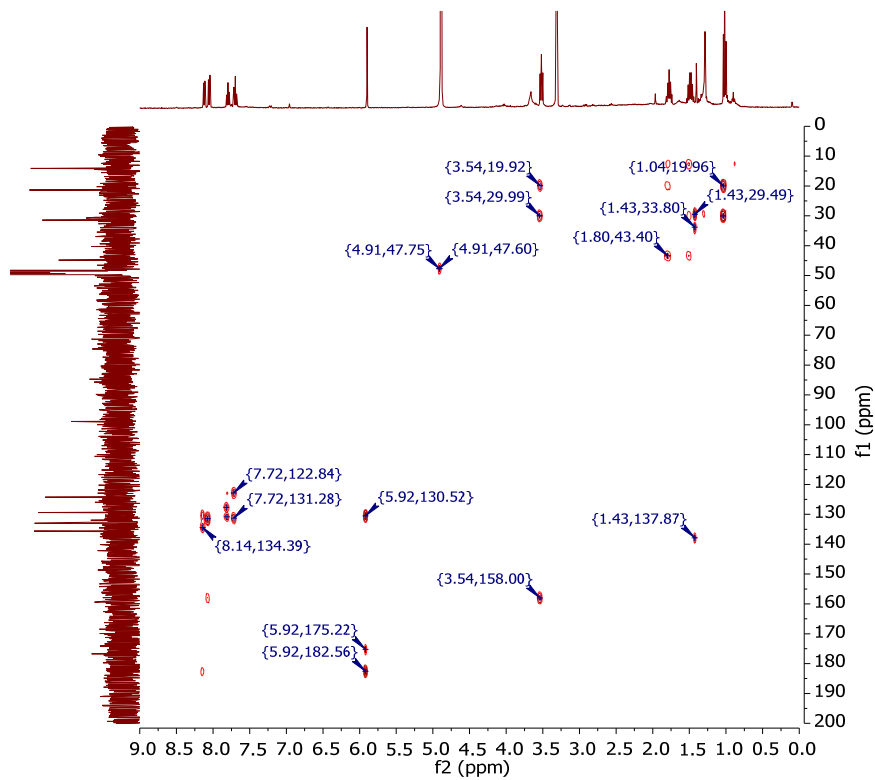

Figure S41. HMBC-NMR spectrum of compound **4e** in MeOD- $d_4$

**Compound 4f:**

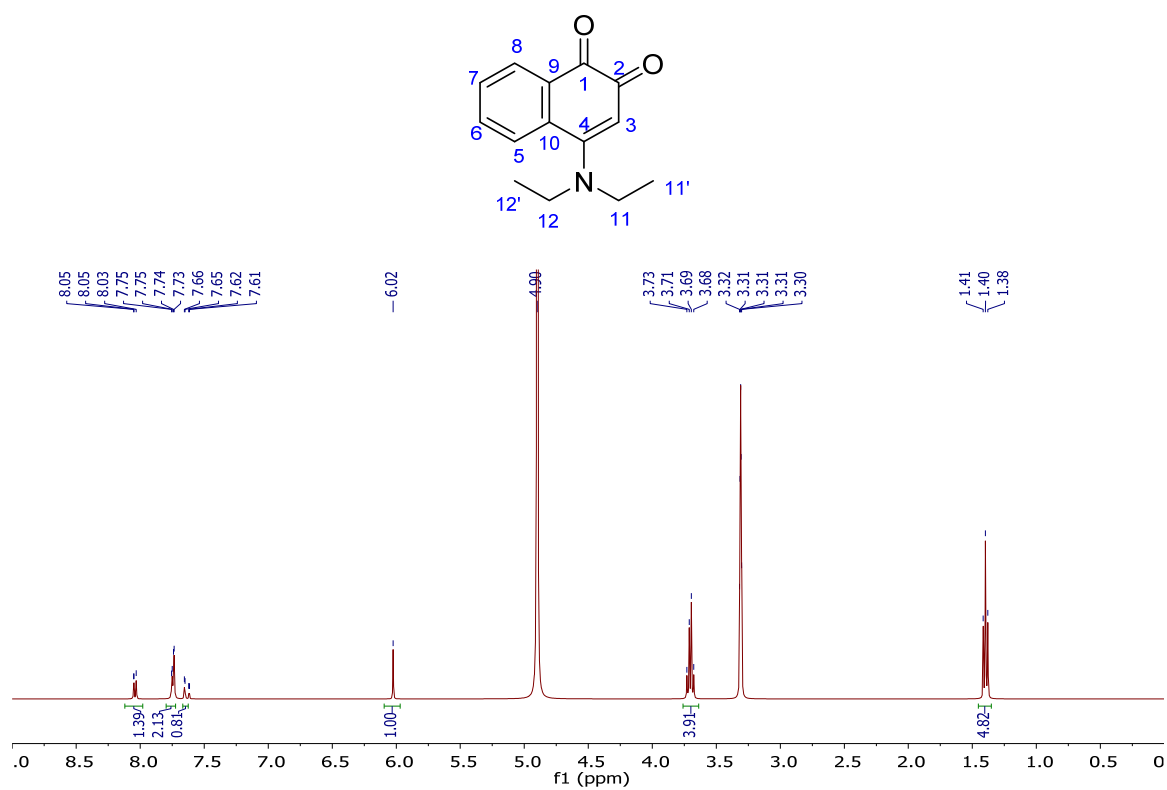

**Figure 1S42.**  $^1\text{H}$ -NMR spectrum of compound **4e** in  $\text{MeOD}-d_4$

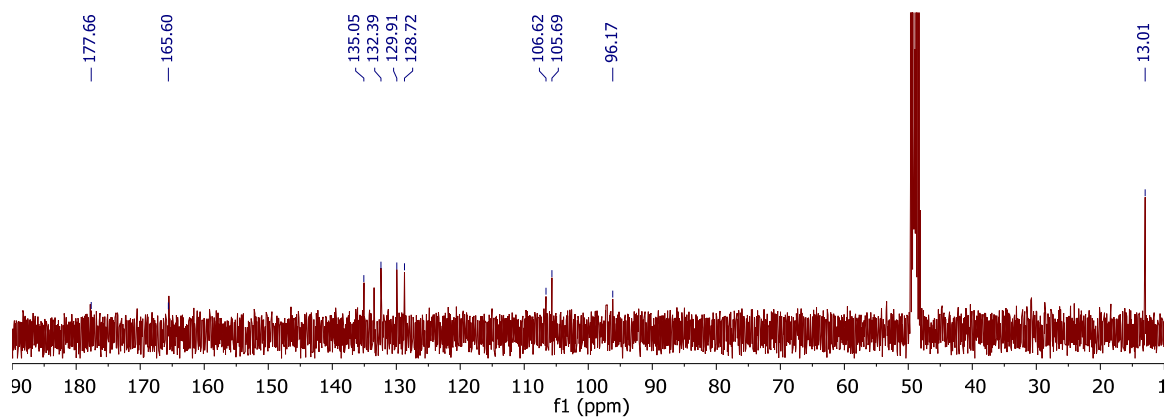

**Figure S43.**  $^{13}\text{C}$ -NMR spectrum of compound **4e** in  $\text{MeOD}-d_4$

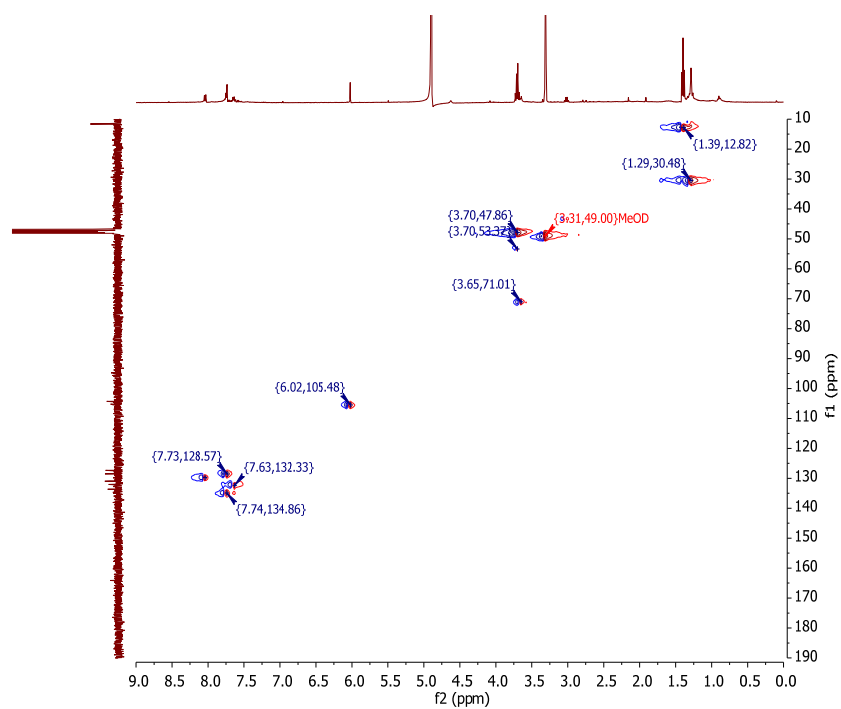

Figure S44. HSQC-NMR spectrum of compound **4e** in MeOD- $d_4$

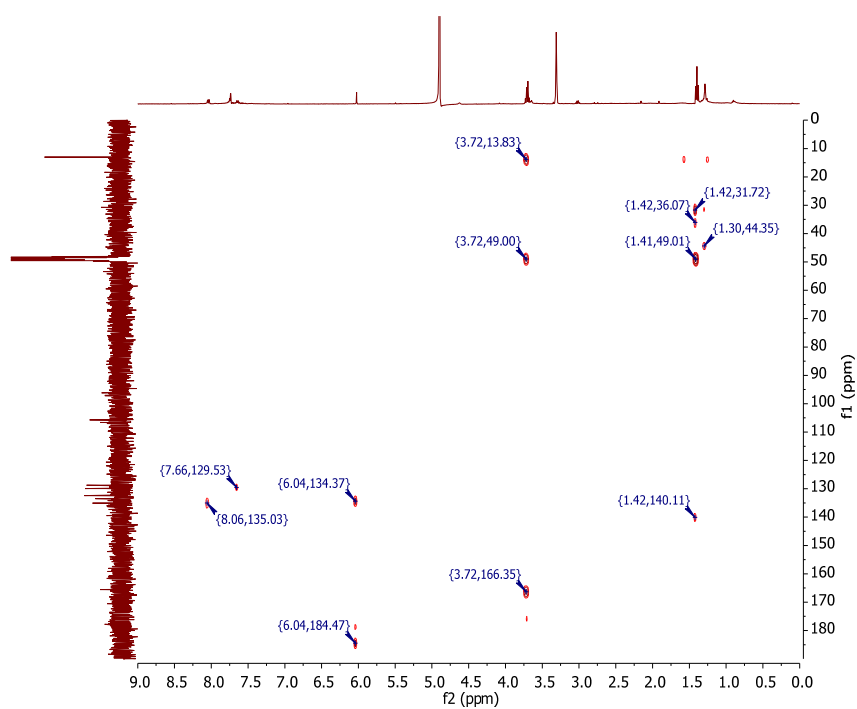

Figure S45. HMBC-NMR spectrum of compound **4e** in MeOD- $d_4$

**Compound 4h:**

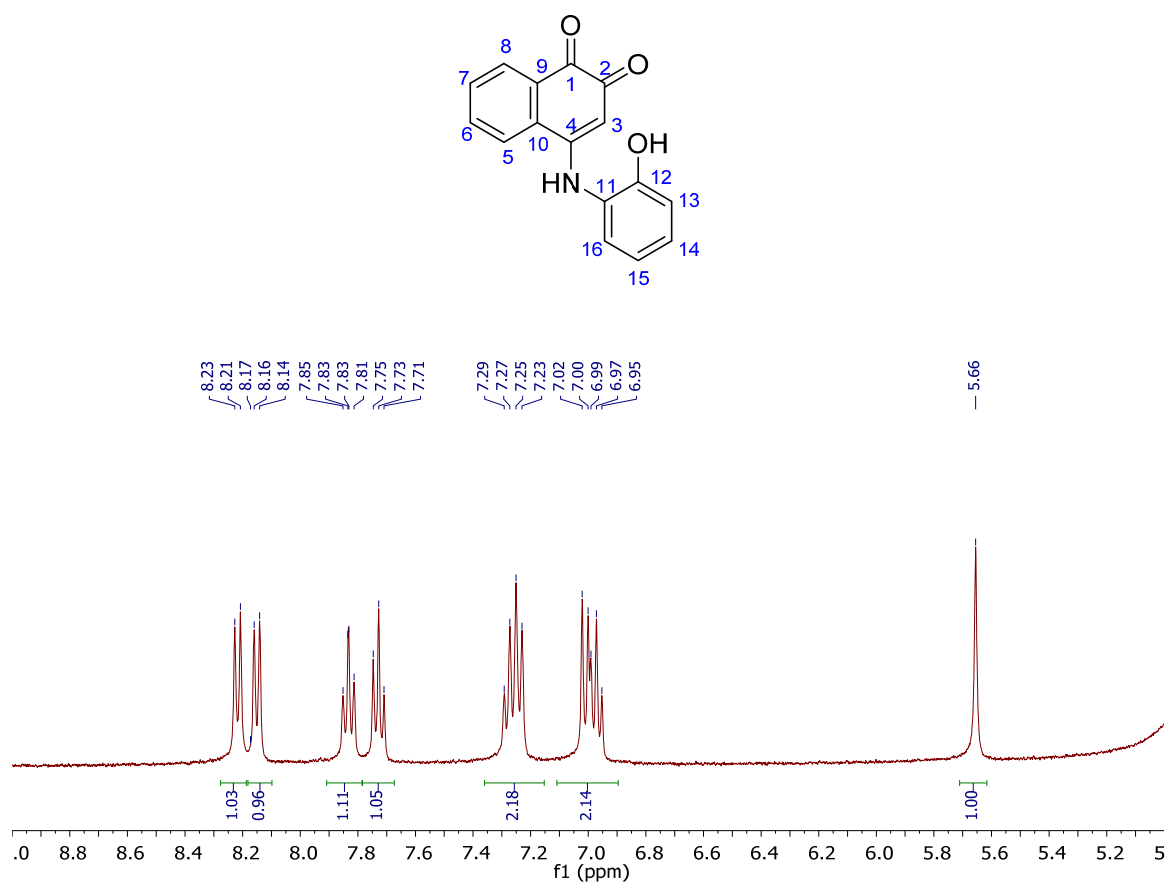

**Figure S46.**  $^1\text{H}$ -NMR spectrum of compound **4h** in  $\text{MeOD}-d_4$

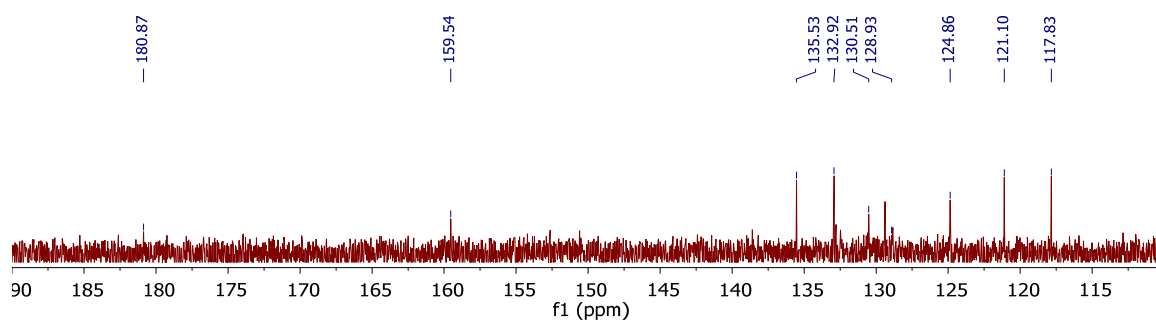

**Figure S47.**  $^{13}\text{C}$ -NMR spectrum of compound **4h** in  $\text{MeOD}-d_4$

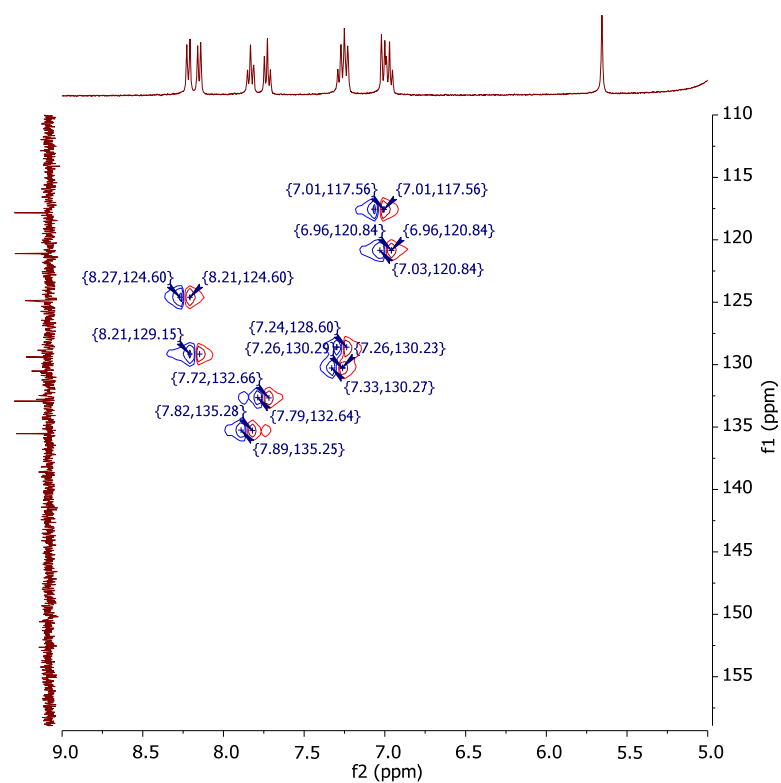

Figure S48. HSQC-NMR spectrum of compound **4h** in MeOD- $d_4$

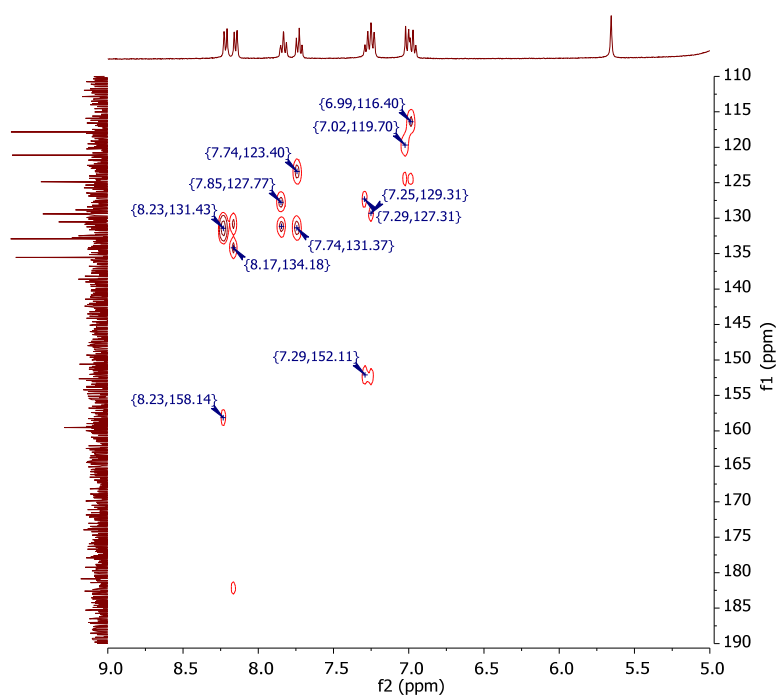

Figure S49. HMBC-NMR spectrum of compound **4h** in MeOD- $d_4$

## 8. ESI/MS spectra

ESI/MS spectra of compound **3a** (C<sub>16</sub>H<sub>12</sub>N<sub>2</sub>O<sub>2</sub>) MW= 264.3 g/mol

Negative mode  $m/z = 263$  [M-H]<sup>-</sup>; Positive mode  $m/z = 265$  [M+H]<sup>+</sup>;

A)

NH2 #144-212 RT: 0,82-1,14 AV: 28 NL: 5,27E2  
T: ITMS - c ESI Full ms [100,00-1000,00]

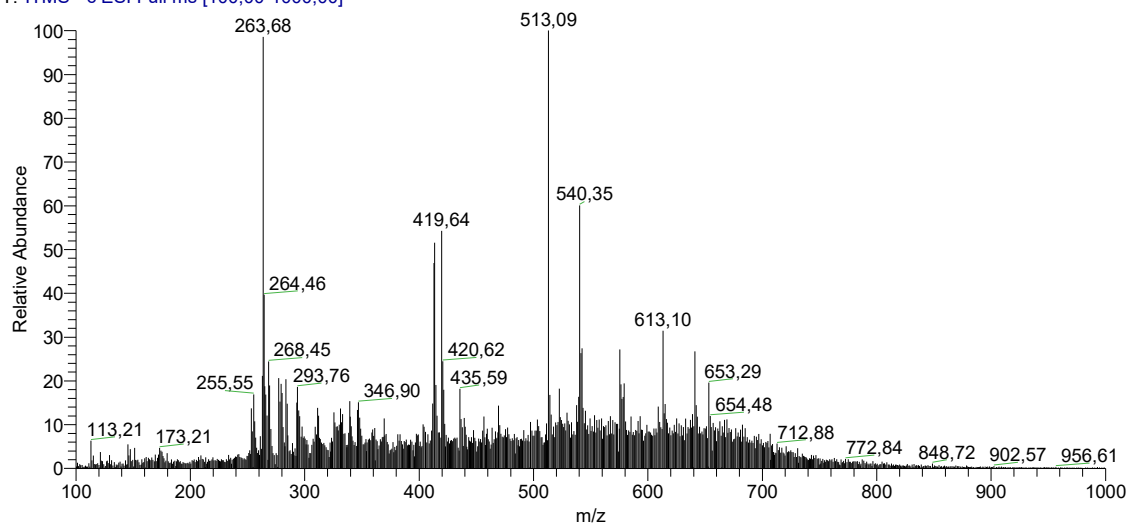

B)

NH2 #1-145 RT: 0,00-0,49 AV: 90 NL: 1,22E5  
T: ITMS + c ESI Full ms [100,00-1000,00]

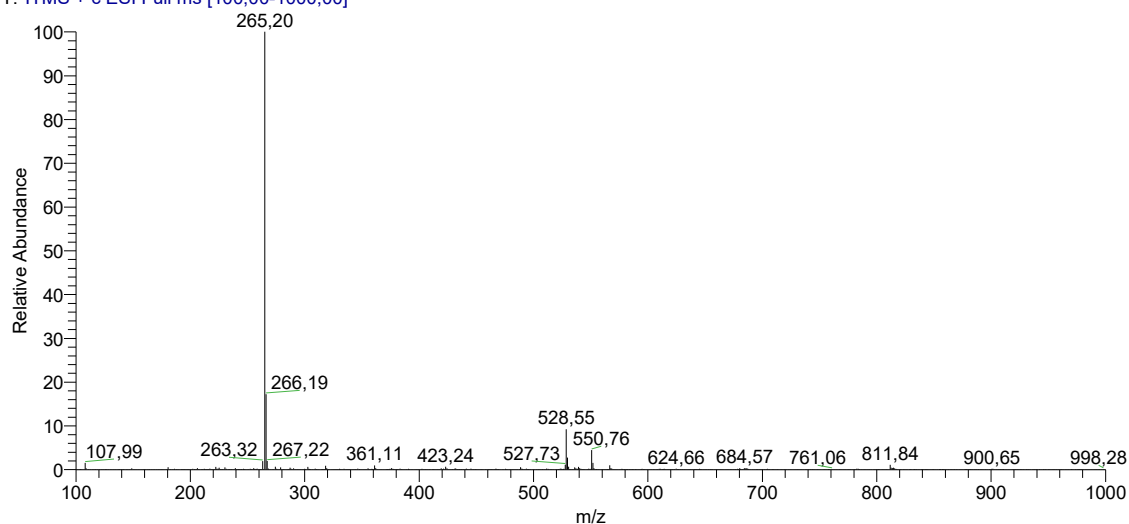

Figure S50. A) ESI(-)/MS spectrum of compound **3a**; C) ESI(+)/MS spectrum of compound **3a**.

ESI/MS spectra of compound **3b** (C<sub>16</sub>H<sub>11</sub>NO<sub>3</sub>) MW= 265.3 g/mol

Negative mode  $m/z = 264$  [M-H]<sup>-</sup>; Positive mode  $m/z = 266$  [M+H]<sup>+</sup>;

A)

OH #453-563 RT: 2,24-3,18 AV: 111 NL: 2,79E3  
T: ITMS - c ESI Full ms2 264,00@cid27,00 [70,00-270,00]

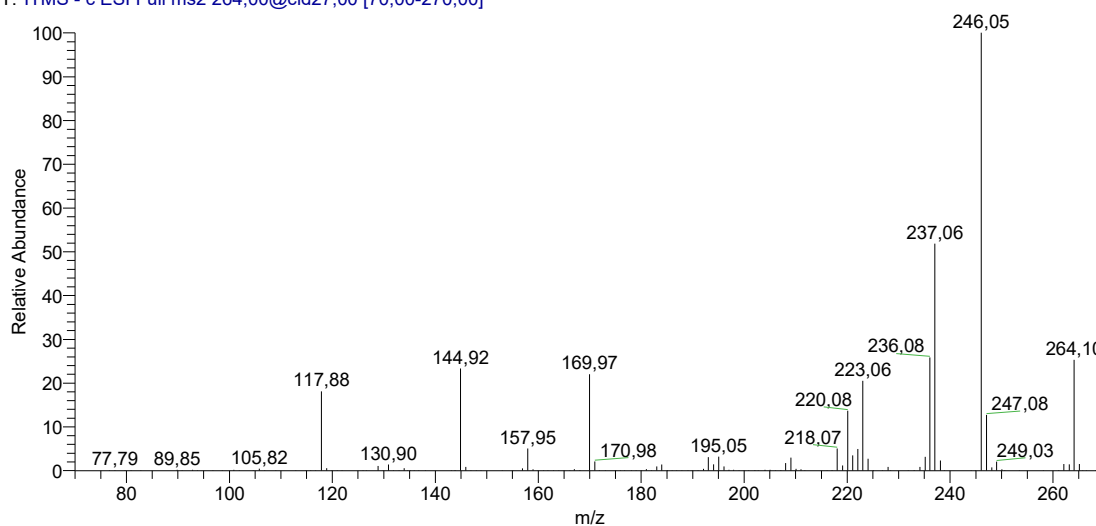

B)

OH #137-329 RT: 0,60-1,64 AV: 193 NL: 7,08E3  
T: ITMS + c ESI Full ms2 266,00@cid27,00 [70,00-271,00]

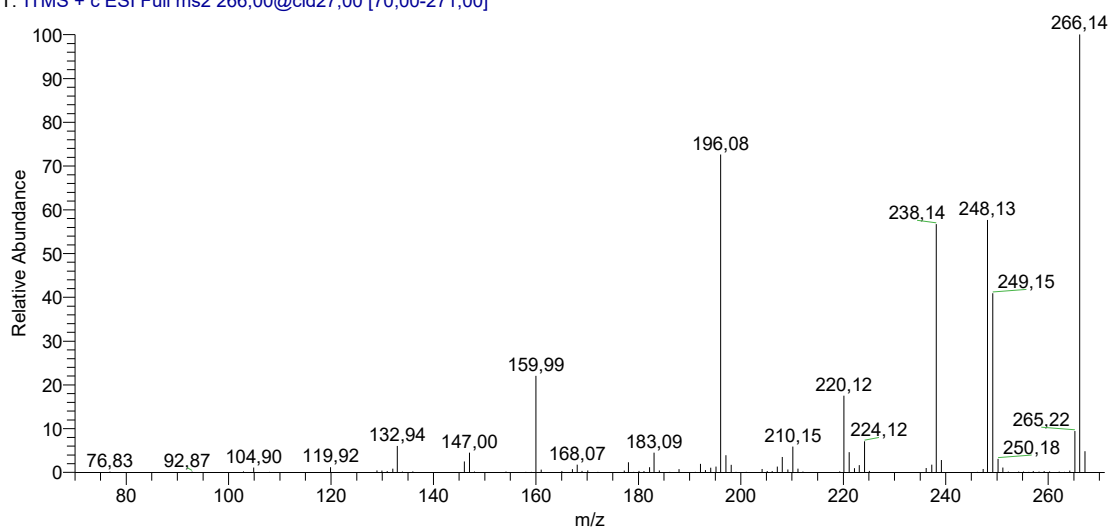

**Figure S51.** A) ESI(-)/MS spectrum of compound **3b**, B) ESI(+)/MS spectrum of compound **3b**.



ESI/MS spectra of compound **3c** (C<sub>16</sub>H<sub>11</sub>NO<sub>3</sub>) MW= 279.1 g/mol

Positive mode  $m/z = 280$  [M+H]<sup>+</sup>;

OCH3 #1-84 RT: 0,00-0,38 AV: 84 NL: 1,40E4  
T: ITMS + c ESI Full ms [135,00-700,00]

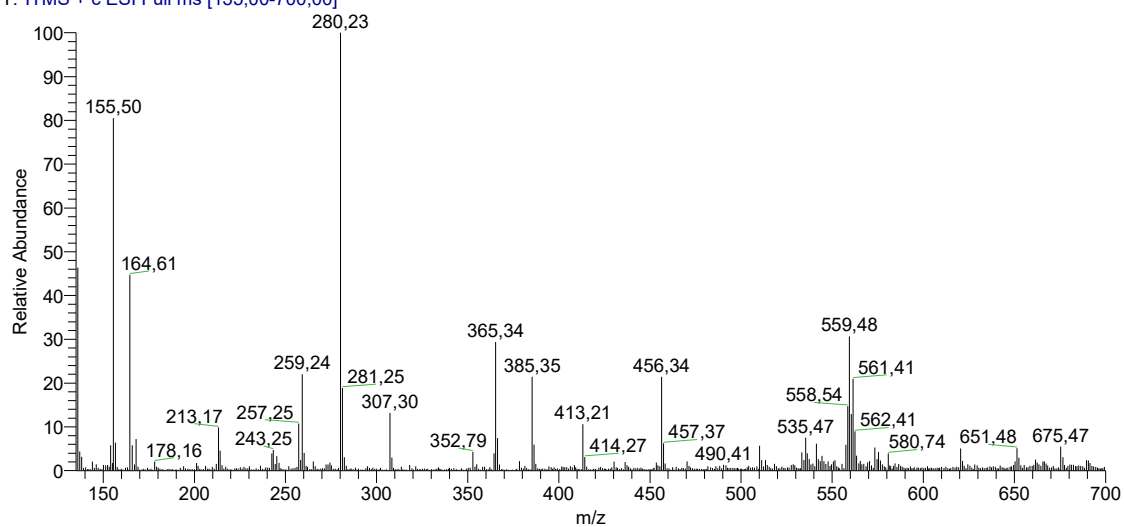

**Figure S52.** ESI(+)/MS spectrum of compound **3c**.

ESI/MS spectra of compound **3d** (C<sub>16</sub>H<sub>11</sub>NO<sub>3</sub>) MW= 274.1 g/mol

Negative mode  $m/z = 273$  [M-H]<sup>-</sup>; Positive mode  $m/z = 275$  [M+H]<sup>+</sup>;

A)

CN #20-182 RT: 0,08-0,75 AV: 163 NL: 6,11E4  
T: ITMS - c ESI Full ms [135,00-600,00]

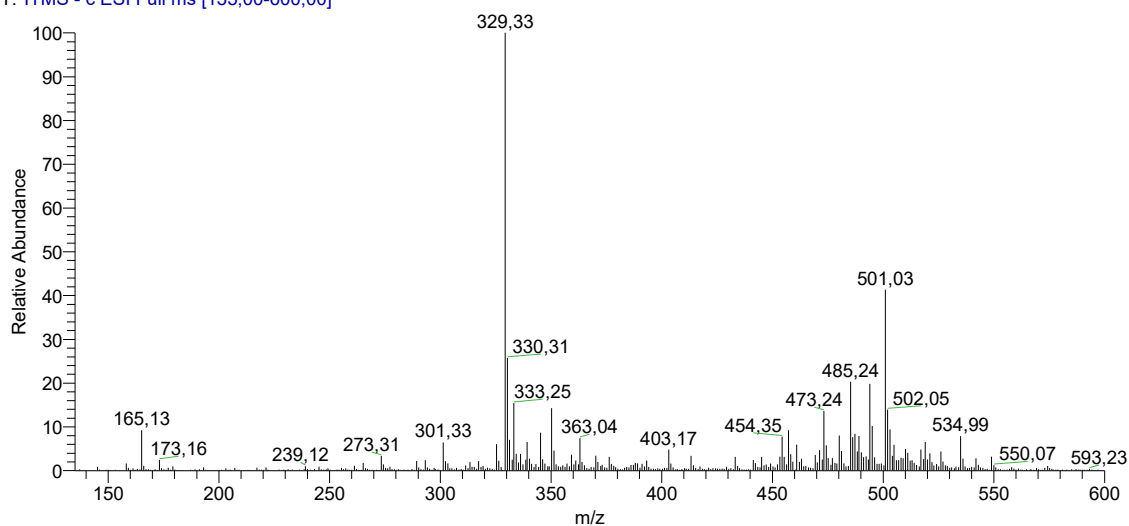

B)

CN #363-458 RT: 1,54-2,67 AV: 96 NL: 3,38E1  
T: ITMS + c ESI Full ms2 275,00@cid27,00 [75,00-280,00]

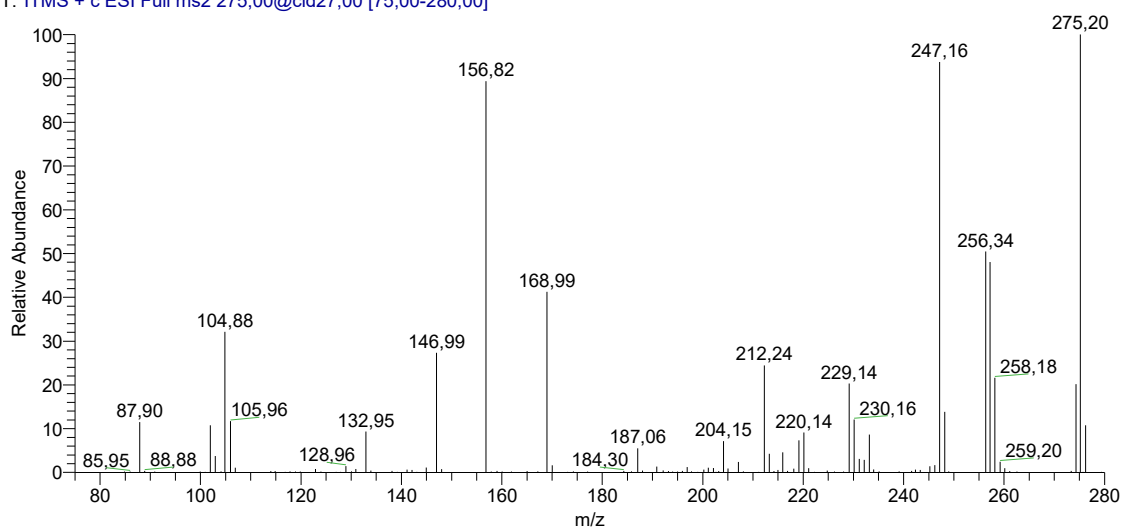

**Figure S53.** A) ESI(-)/MS spectrum of compound **3d**, B) ESI(+)/MS spectrum of compound **3d**.

ESI/MS spectra of compound **3e** (C<sub>14</sub>H<sub>15</sub>NO<sub>2</sub>) MW= 229.1 g/mol

Negative mode  $m/z = 228$  [M-H]<sup>-</sup>; Positive mode  $m/z = 230$  [M+H]<sup>+</sup>;

A)

RC44 #283-414 RT: 1,79-3,06 AV: 132 NL: 4,26E2  
T: ITMS - c ESI Full ms [100,00-470,00]

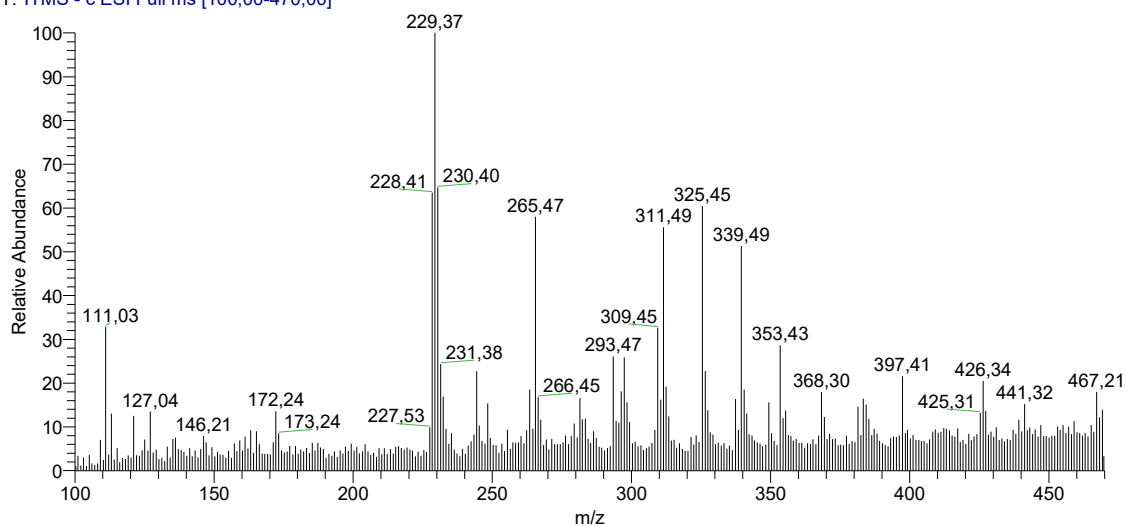

B)

RC44 #11-150 RT: 0,05-0,69 AV: 140 NL: 6,82E3  
T: ITMS + c ESI Full ms [100,00-470,00]

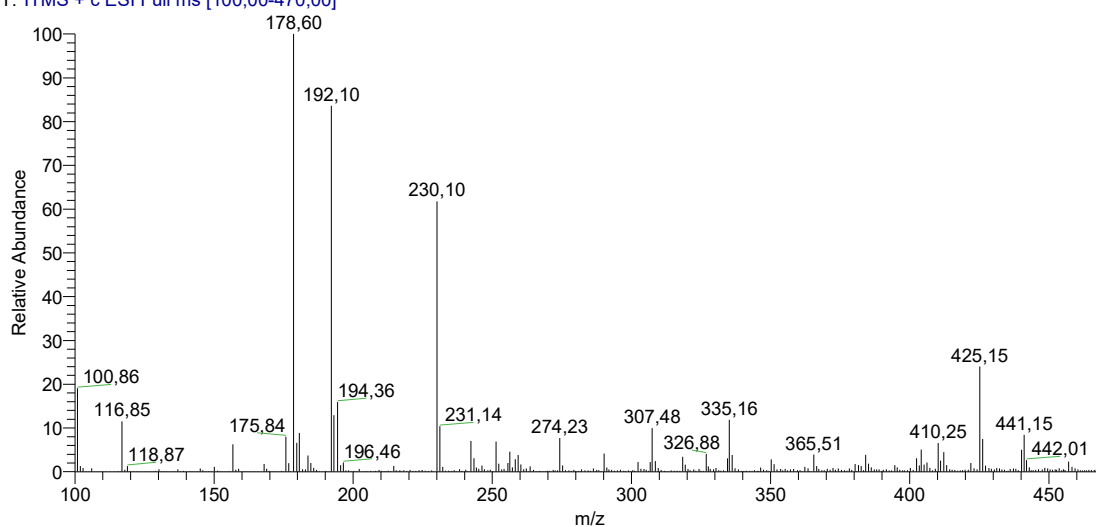

Figure S54. A) ESI(-)/MS spectrum of compound **3e**, B) ESI(+)/MS spectrum of compound **3e**.

ESI/MS spectra of compound **3f** (C<sub>14</sub>H<sub>15</sub>NO<sub>2</sub>) MW= 229.11 g/mol

Positive mode  $m/z = 230$  [M+H]<sup>+</sup>;

RC49-purificado #13-184 RT: 0,06-0,86 AV: 172 NL: 9,58E3  
T: ITMS + c ESI Full ms [100,00-600,00]

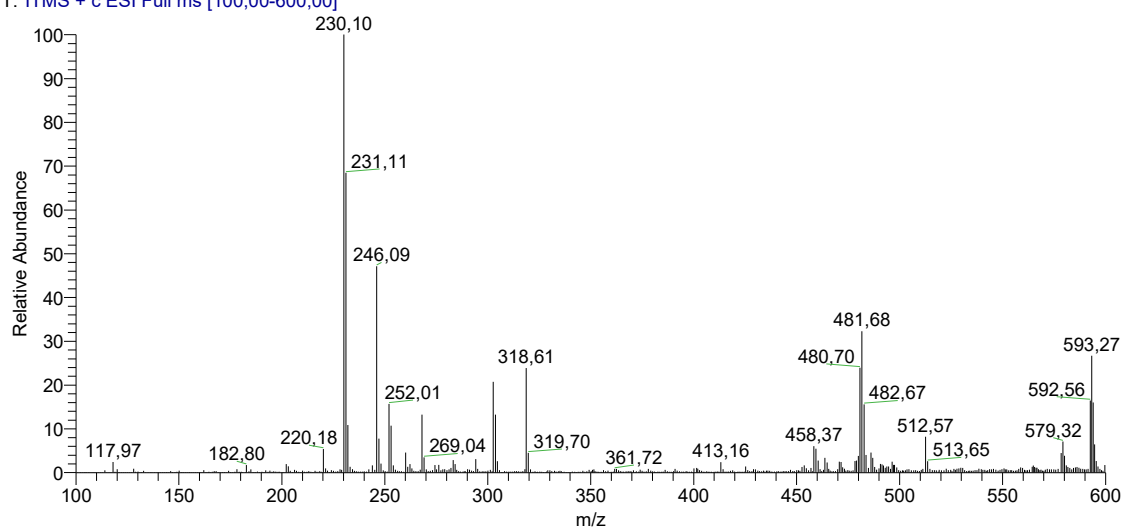

Figure S55. ESI(+)/MS spectrum of compound **3f**.

ESI/MS spectra of compound **4e** (C<sub>14</sub>H<sub>15</sub>NO<sub>2</sub>) MW= 229.1 g/mol

Negative mode  $m/z = 228$  [M-H]<sup>-</sup>; Positive mode  $m/z = 230$  [M+H]<sup>+</sup>;

A)

GV1 #301-454 RT: 3,24-4,02 AV: 153 NL: 7,30E3  
T: ITMS + c ESI Full ms [105,00-600,00]

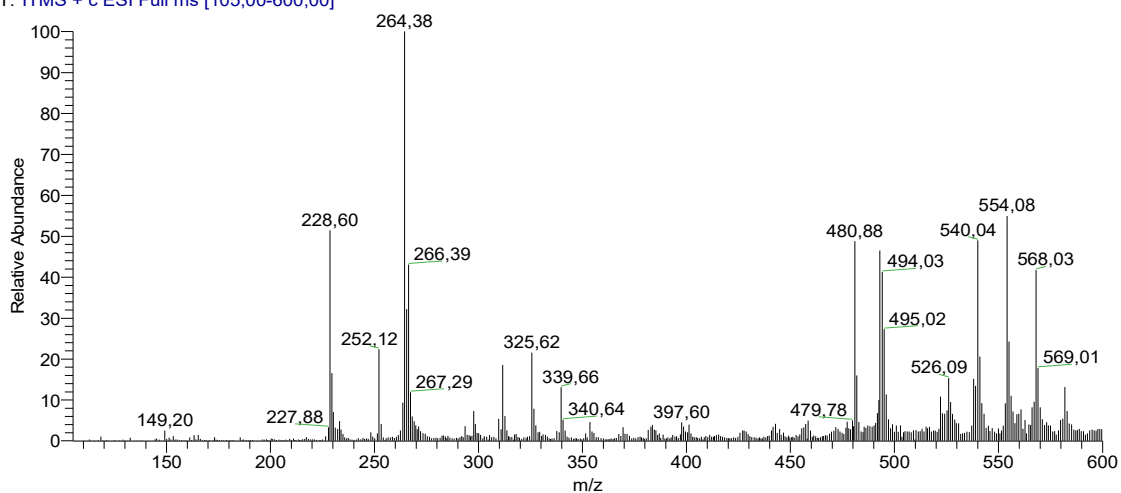

B)

GV1 #1-116 RT: 0,00-0,68 AV: 112 NL: 1,91E5  
T: ITMS + c ESI Full ms [105,00-600,00]

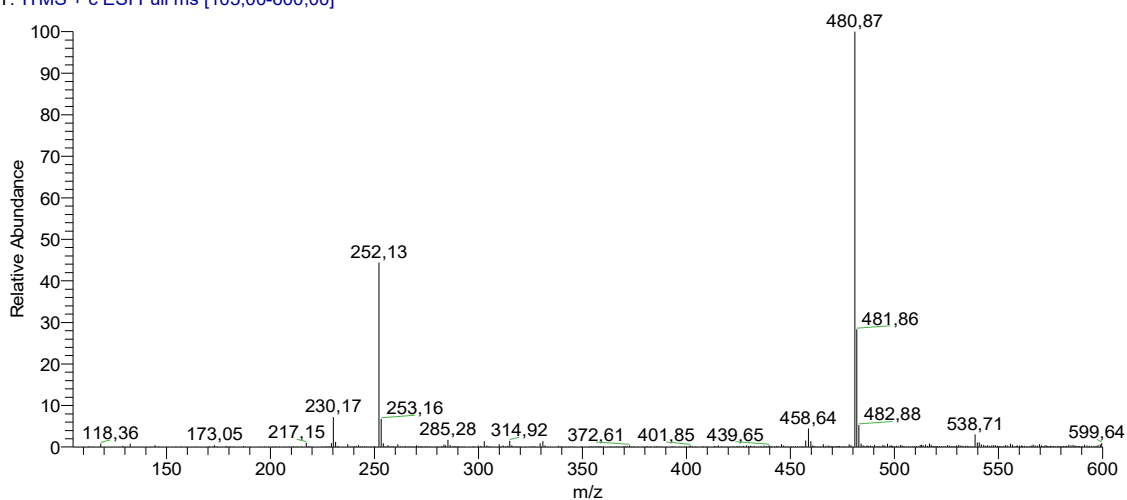

Figure S56. A) ESI(-)/MS spectrum of compound **4e**, B) ESI(+)/MS spectrum of compound **4e**.

ESI/MS spectra of compound **4f** (C<sub>14</sub>H<sub>15</sub>NO<sub>2</sub>) MW= 229.11 g/mol

Positive mode  $m/z = 230$  [M+H]<sup>+</sup>;

GV3 #1-94 RT: 0,00-0,53 AV: 87 NL: 6,00E4  
T: ITMS + c ESI Full ms [105,00-600,00]

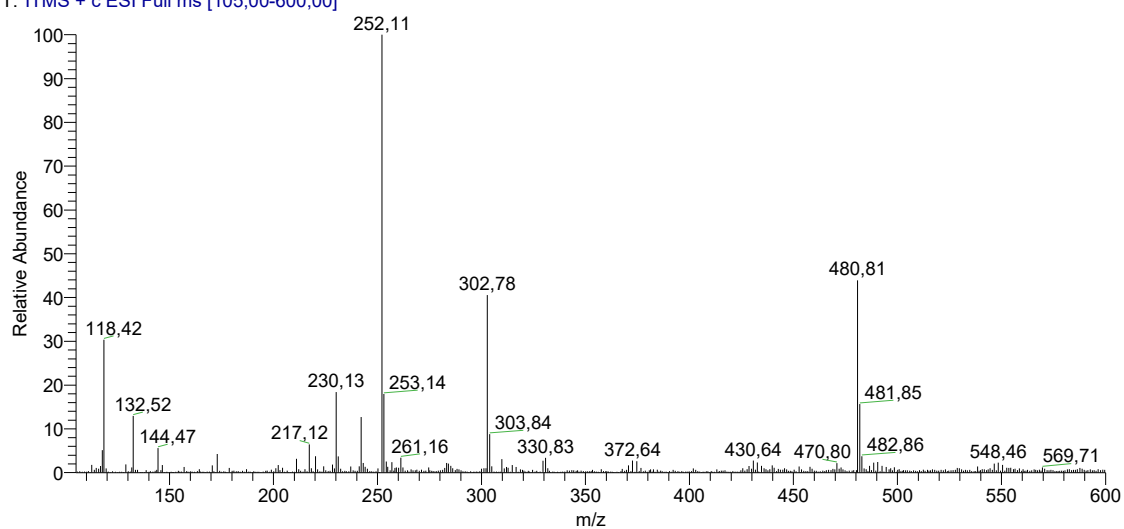

**Figure S57.** ESI(+)/MS spectrum of compound **4f**.

ESI/MS spectra of compound **4h** (C<sub>16</sub>H<sub>11</sub>NO<sub>3</sub>) MW= 265.3 g/mol

Negative mode  $m/z = 264$  [M-H]<sup>-</sup>; Positive mode  $m/z = 266$  [M+H]<sup>+</sup>;

A)

OH #308-377 RT: 2,14-2,48 AV: 28 NL: 1,58E3  
T: ITMS - c ESI Full ms2 264,00@cid27,00 [70,00-270,00]

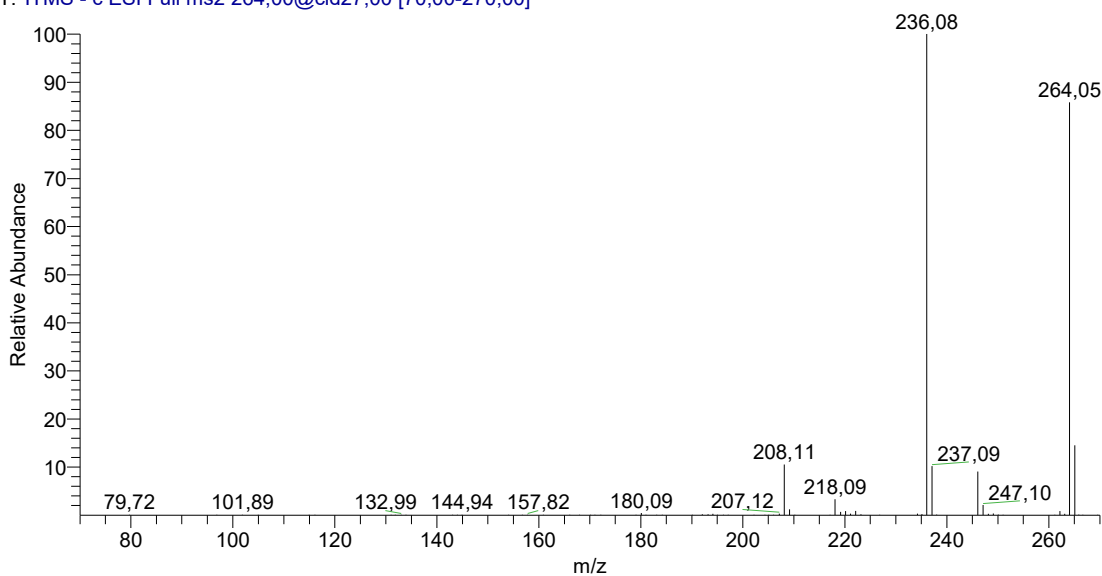

B)

OH #1-102 RT: 0,00-0,52 AV: 102 NL: 1,26E4  
T: ITMS + c ESI Full ms [100,00-650,00]

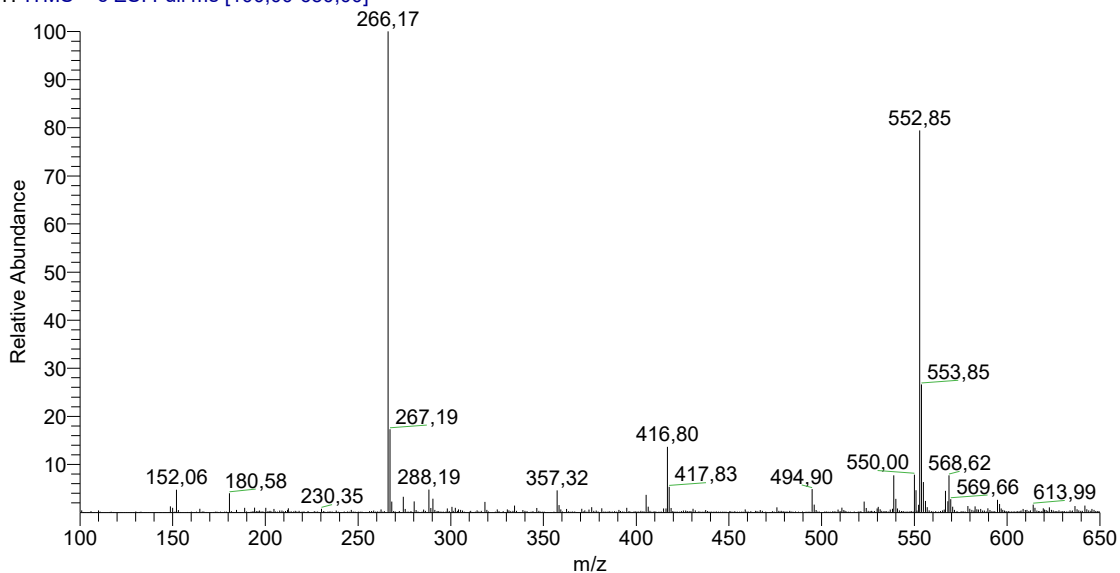

**Figure S58.** A) ESI(-)/MS spectrum of compound **4h**, B) ESI(+)/MS spectrum of compound **4h**.

## 9. HRESI/TOFMS spectra

### Acquisition Parameter

|             |          |                      |          |                  |           |
|-------------|----------|----------------------|----------|------------------|-----------|
| Source Type | ESI      | Ion Polarity         | Positive | Set Nebulizer    | 2.8 Bar   |
| Focus       | Active   | Set Capillary        | 4500 V   | Set Dry Heater   | 200 °C    |
| Scan Begin  | 100 m/z  | Set End Plate Offset | -500 V   | Set Dry Gas      | 8.0 l/min |
| Scan End    | 1000 m/z | Set Charging Voltage | 2000 V   | Set Divert Valve | Waste     |
|             |          | Set Corona           | 0 nA     | Set APCI Heater  | 0 °C      |

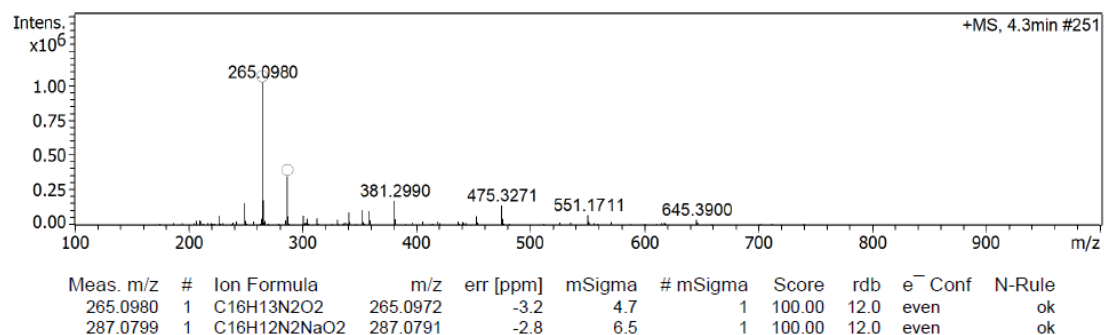

Figure S59. HR ESI(+)/MS spectrum of compound **3a**.

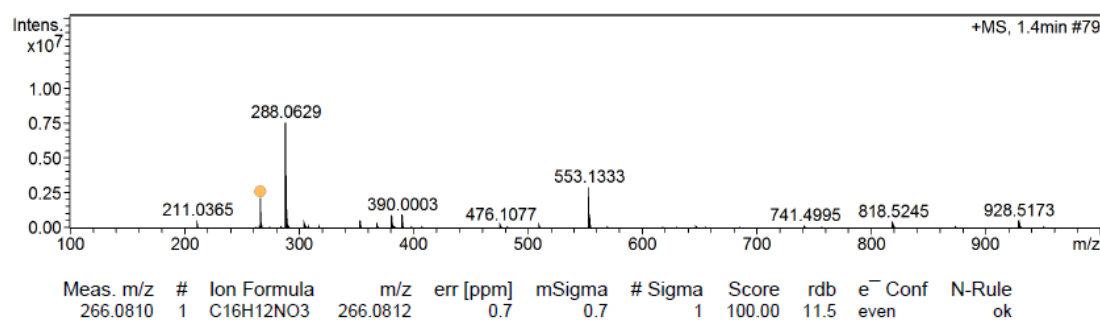

Figure S60. HR ESI(+)/MS spectrum of compound **3b**.

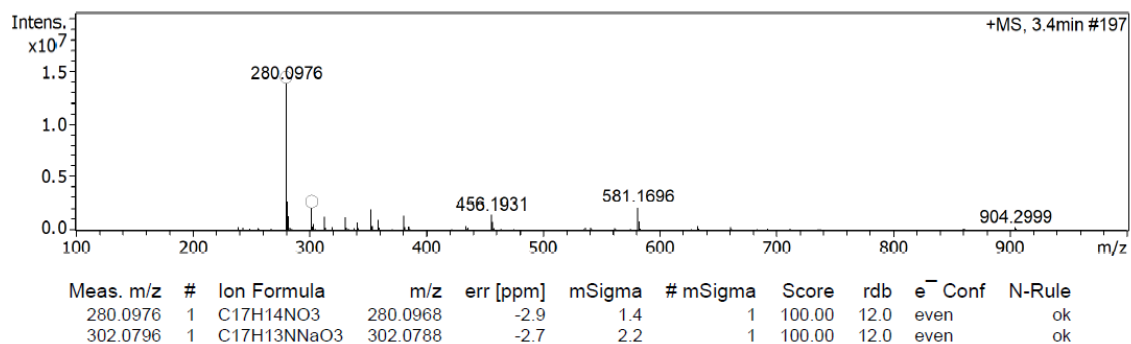

Figure S61. HR ESI(+)/MS spectrum of compound **3c**.



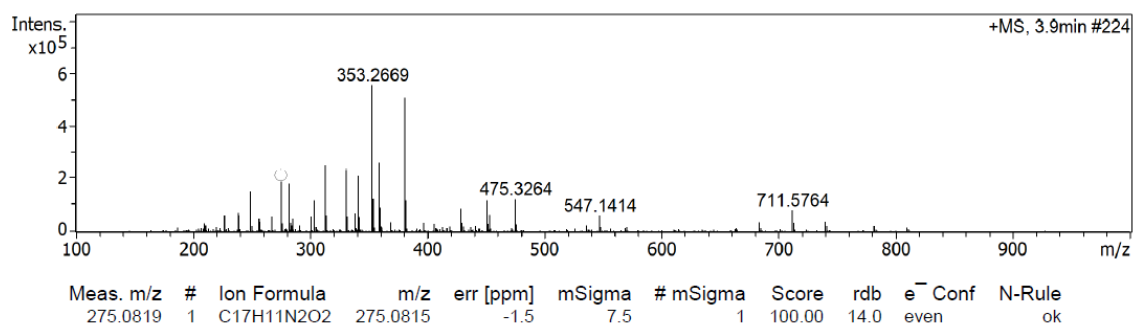

**Figure S62.** HR ESI(+)/MS spectrum of compound **3d**.

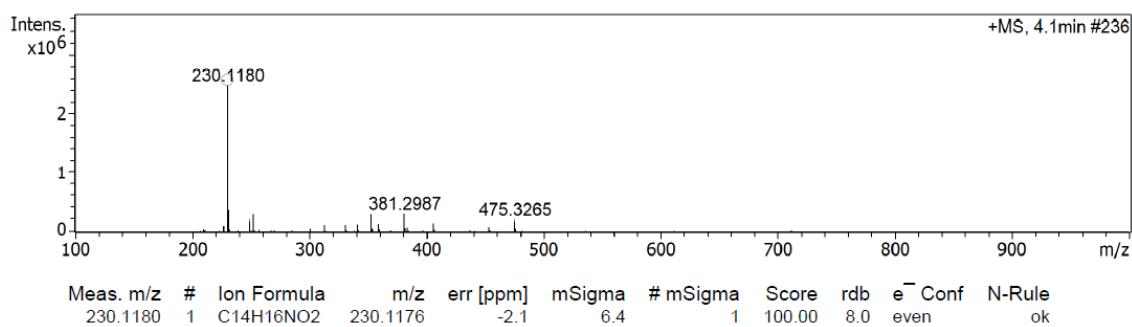

**Figure S63.** HR ESI(+)/MS spectrum of compound **3e**

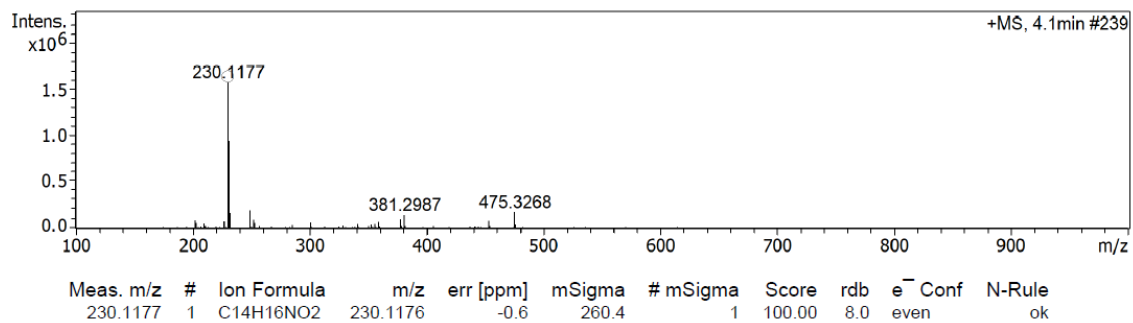

**Figure S64.** HR ESI(+)/MS spectrum of compound **3f**.

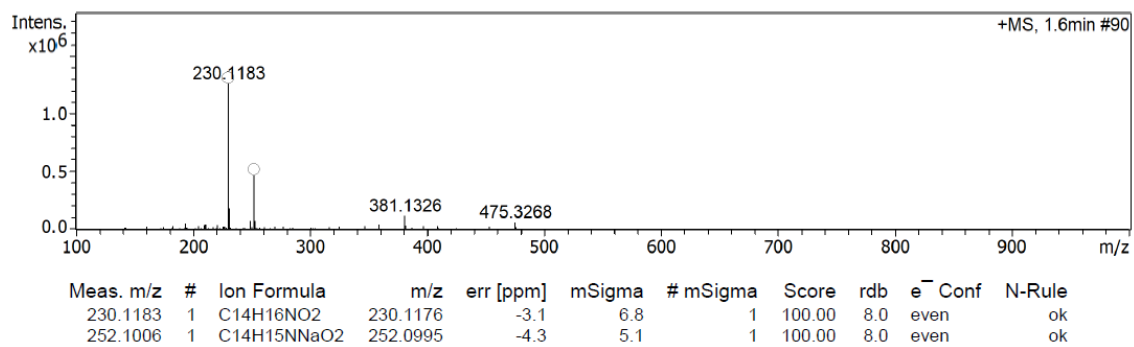

**Figure S65.** HR ESI(+)/MS spectrum of compound **4e**

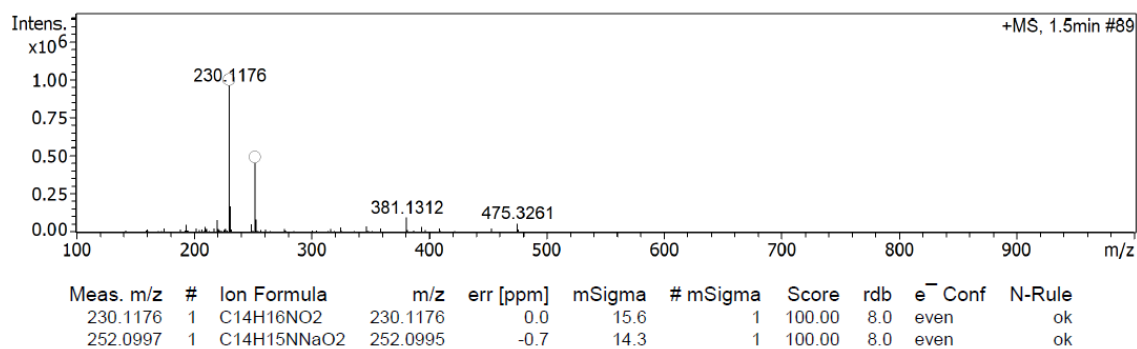

**Figure S66.** HR ESI(+)/MS spectrum of compound **4f**
